# Supplementary material for: Key intermediates and Cu active sites for CO2 electroreduction to ethylene and ethanol
Source: Springer Nature journal article supplement (doi:10.1038/s41560-024-01633-4), 2024-09-11
Supplement: MOESM1 [file 41560_2024_1633_MOESM1_ESM.pdf]

Key intermediates and Cu active sites for CO<sub>2</sub> electroreduction to ethylene and ethanol

*Original*

Key intermediates and Cu active sites for CO<sub>2</sub> electroreduction to ethylene and ethanol / Zhan, Chao; Dattila, Federico; Rettenmaier, Clara; Herzog, Antonia; Herran, Matias; Wagner, Timon; Scholten, Fabian; Bergmann, Arno; López, Núria; Roldan Cuenya, Beatriz. - In: NATURE ENERGY. - ISSN 2058-7546. - (2024). [10.1038/s41560-024-01633-4]

*Availability:*

This version is available at: 11583/2992501 since: 2024-09-16T08:21:21Z

*Publisher:*

Springer

*Published*

DOI:10.1038/s41560-024-01633-4

*Terms of use:*

This article is made available under terms and conditions as specified in the corresponding bibliographic description in the repository

*Publisher copyright*

(Article begins on next page)

---

# Key intermediates and Cu active sites for CO<sub>2</sub> electroreduction to ethylene and ethanol

---

In the format provided by the authors and unedited

---

The PDF file includes:

Supplementary Notes 1,2

Supplementary Figures 1-30

Supplementary Tables 1-19

Supplementary References

## Supplementary Notes

### Supplementary Note 1 | Identification of $^*\text{OCHCH}_2$ formation as selectivity-determining step toward ethanol.

According to Ref.[<sup>1</sup>], only acetaldehyde and ethanol were observed by Online Electrochemical Mass Spectrometry (OLEMS) during reduction of 0.05 M glyoxal and 0.05 M glycolaldehyde on copper in a phosphate buffer (0.1 M  $\text{K}_2\text{HPO}_4$  + 0.1 M  $\text{KH}_2\text{PO}_4$ , pH 7). Successive mechanistic studies on glyoxal reduction demonstrated that such intermediate mainly reduces to ethanol and ethylene glycol, with acetaldehyde and glycolaldehyde as minor reaction products.<sup>1-3</sup> Ethylene almost does not appear during glyoxal reduction, with partial current density around  $0.01 \text{ mA/cm}^{-2}$  at  $-1.0 \text{ V}$  vs RHE for  $0.02 \text{ mol l}^{-1}$  glyoxal in  $0.1 \text{ mol l}^{-1}$  phosphate buffer.

Typically, the absence of ethylene and the concurrent formation of ethylene glycol at significant rates during glyoxal reduction (opposite to the low rates reported during  $\text{CO}_2$  reduction)<sup>4</sup> have been assumed as strong proofs that glyoxal is not an intermediate during  $\text{CO}_2$  reduction to  $\text{C}_{2+}$  products. In line with Ref.[<sup>5</sup>], we here suggest that glyoxal and glycolaldehyde reduce to ethylene glycol through the  $^*\text{OCHCH}_2\text{OH}$  intermediate, which (1) either converts to  $^*\text{OCHCH}_2$  through one proton-coupled electron (PCET) step and the loss of a water molecule, or (2) to ethylene glycol  $(\text{CH}_2\text{OH})_2$  via two PCET steps (Supplementary Figure 28). While  $^*\text{OCHCH}_2\text{OH}$  and ethylene glycol are not along the  $\text{CO}_2$  reduction pathway, motivating the low formation rates observed during  $\text{CO}_2\text{RR}$ , we propose that  $^*\text{OCHCH}_2$  is the crucial exclusive precursor for acetaldehyde, ethanol, and 1-propanol. Further, due to the observed absence of ethylene during glyoxal/glycolaldehyde reduction, we propose that  $^*\text{OCHCH}_2$  is not an ethylene precursor, contrarily to the current state-of-the-art assumption.<sup>6</sup>

### Supplementary Note 2 | Effect of active sites' morphology on scaling relationships between strain and binding energy

We here observe that previous studies on strained crystalline surfaces reported an opposite trend than the one reported in Fig. 6a-b, Supplementary Figure 24, i.e. stronger binding energies at higher expansive strain and lower binding elsewhere.<sup>7,8</sup> Such different behavior is ascribable to the distinct morphologies of the selected sites, respectively locally distorted Cu clusters in our case and crystalline surface with varying lattice constant in Refs.[7,8]. While the expansion of the lattice constant leads to an upshift of the d-band center for crystalline domains, such trends is reverted for the distorted sites here modeled (see Supplementary Table 15). Such evidence confirms the need for further mechanistic studies on distorted domains, which have completely different properties than the crystalline well-ordered surfaces.



## Supplementary Figures

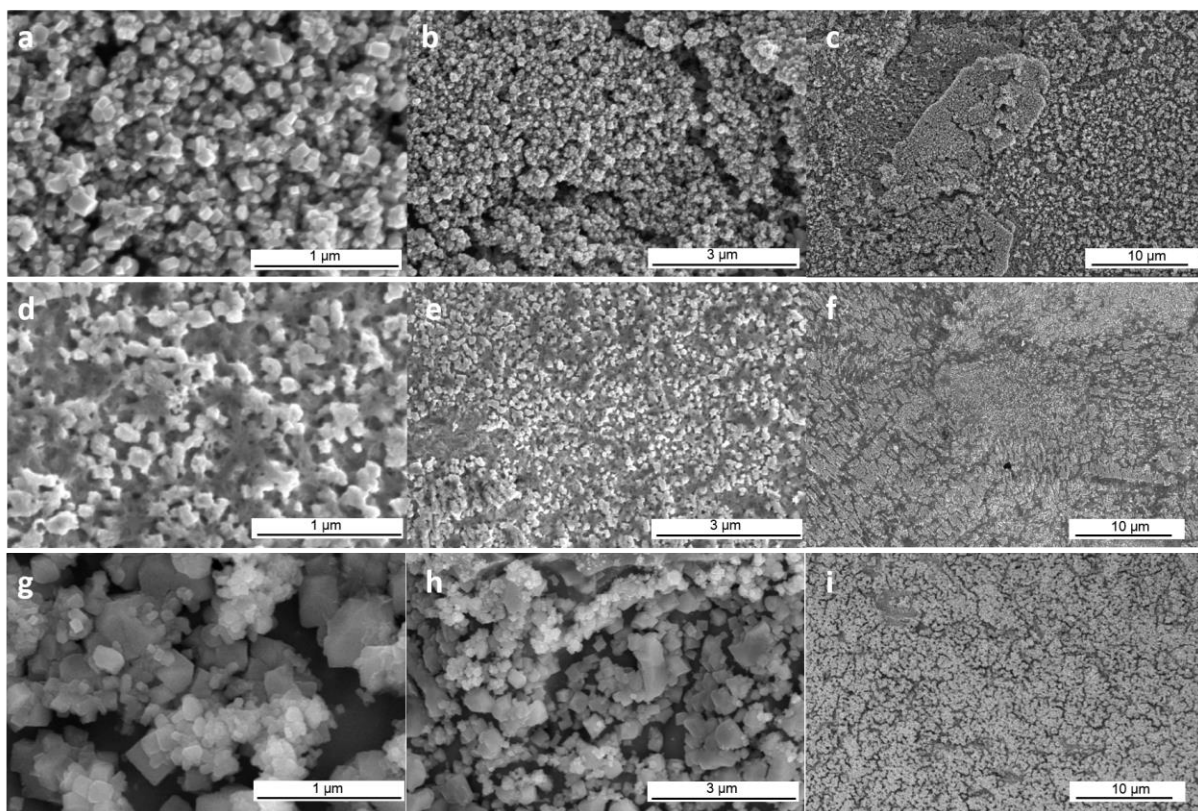

Supplementary Figure 1. SEM images of the electrochemically-treated Cu foil electrode before (a, b, c) and after the  $\text{CO}_2\text{RR}$  in  $\text{CO}_2$ -saturated 0.1 M  $\text{KHCO}_3$  electrolyte at  $-1.0 V_{RHE}$  (d, e, f) or  $-0.8 V_{RHE}$  (g, h, i) for 1 h.

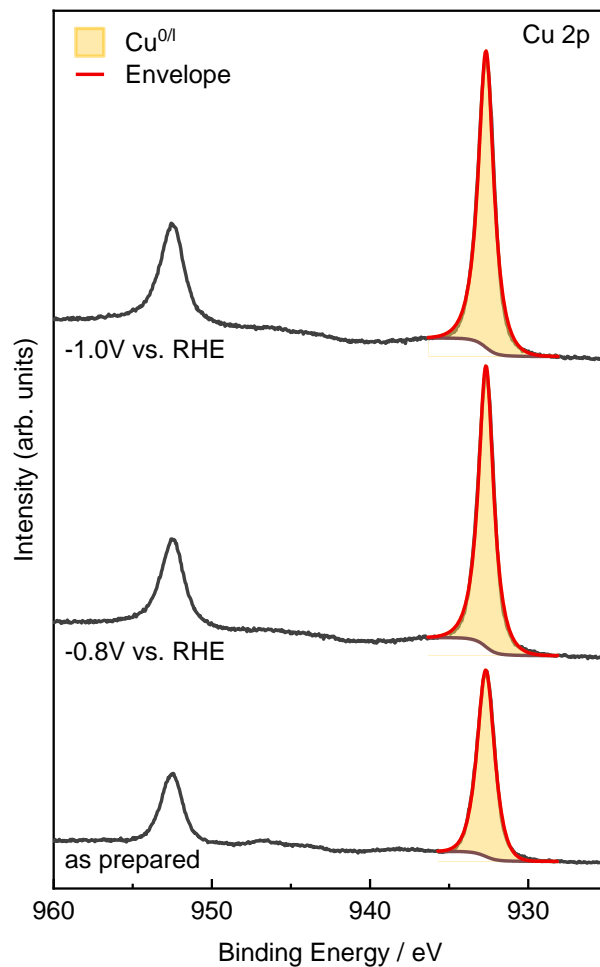

Supplementary Figure 2. Quasi in-situ XPS spectra of the Cu 2p binding energy region of the as-prepared electrochemically-treated Cu foil electrode and the same electrochemically-treated Cu foil electrode after the CO<sub>2</sub>RR at  $-0.8 V_{\text{RHE}}$  and  $-1.0 V_{\text{RHE}}$  for 1 h in CO<sub>2</sub>-saturated 0.1 M KHCO<sub>3</sub> electrolyte without air exposure with the corresponding fits for the Cu 2p<sub>3/2</sub> orbital (red line).

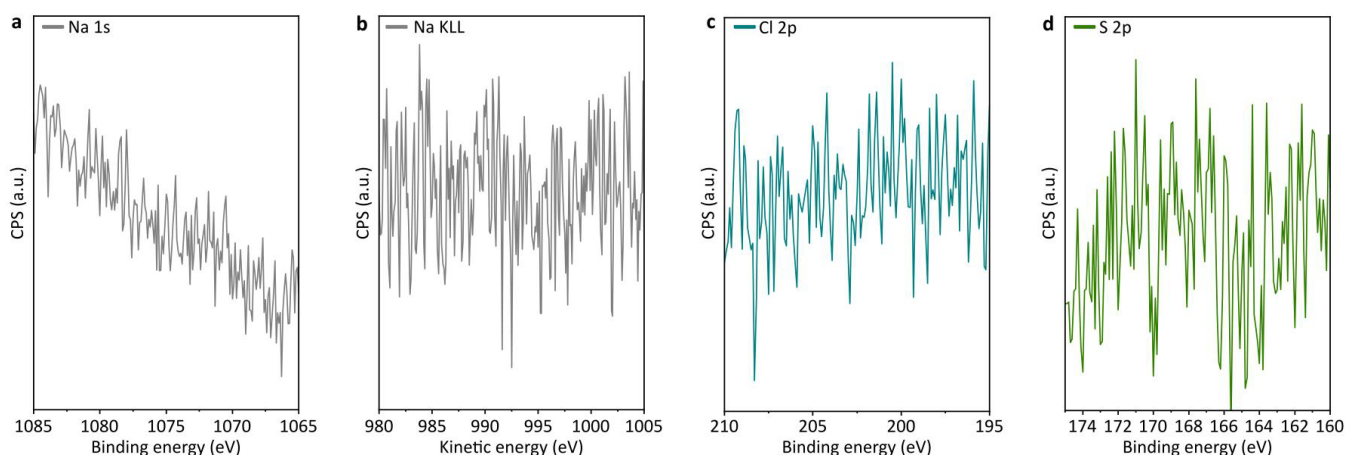

Supplementary Figure 3. The cleanliness of the roughened Cu foil surface was assessed by evaluating the Cl 2p, S 2p as well as Na 1s XPS and Na KLL Auger regions, which represent all elements used during the electropolishing and roughening of the Cu foil. None of the above-mentioned elements could be detected on the surface of the foil after rinsing the sample with ultra-pure water, as done before the CO<sub>2</sub>RR measurements.

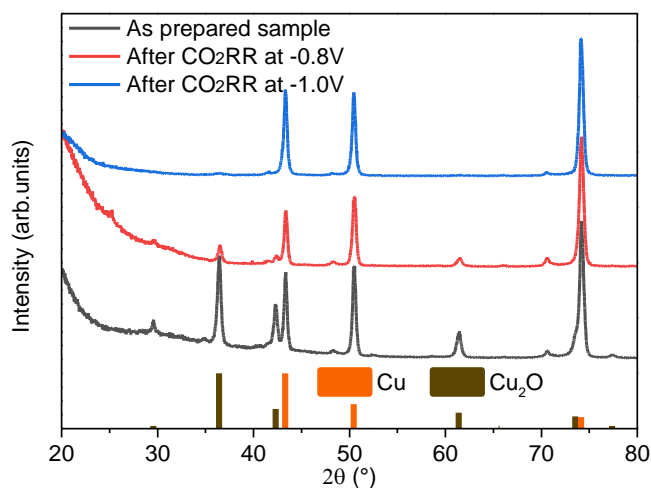

Supplementary Figure 4. XRD pattern of the as-prepared Cu foil electrode before and after CO<sub>2</sub>RR in CO<sub>2</sub>-saturated 0.1 M KHCO<sub>3</sub> electrolyte for 1 h. The intensity of the Cu(200) reflection slightly increased compared to the (111) reflection. However, the absence of a clearly reflected X-ray beam under total reflection condition suggests an information depth above 100 nm and thus, we cannot assign any variations in the XRD pattern to morphological differences in the near-surface region of the electrodes.

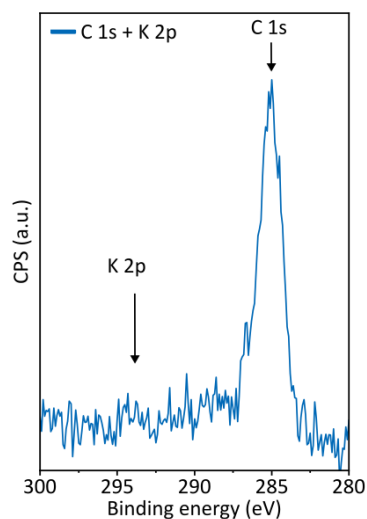

Supplementary Figure 5. XPS regions of K 2p and C 1s were acquired after a quasi-in situ CO<sub>2</sub>RR experiment, which revealed that no potassium residues could be detected from the surface after rinsing the sample in ultra-pure water.

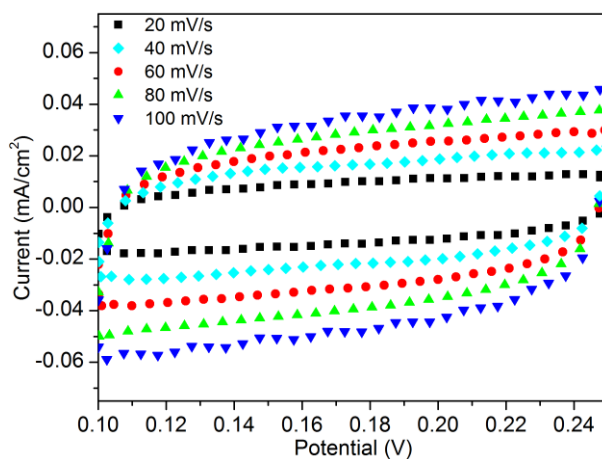

Supplementary Figure 6. Cyclic voltammety of the electrochemically-treated Cu foil electrode from 0.10 to 0.25 V<sub>RHE</sub> at scan rates of 20, 40, 60, 80, and 100 mV/s in a CO<sub>2</sub>-saturated 0.1 M KHCO<sub>3</sub> solution after 1 h of CO<sub>2</sub>RR test. The capacitance value of electrochemically-treated Cu foil is 0.395 mF/cm<sup>2</sup>, and the electropolished Cu foil is 0.027 mF/cm<sup>2</sup>.

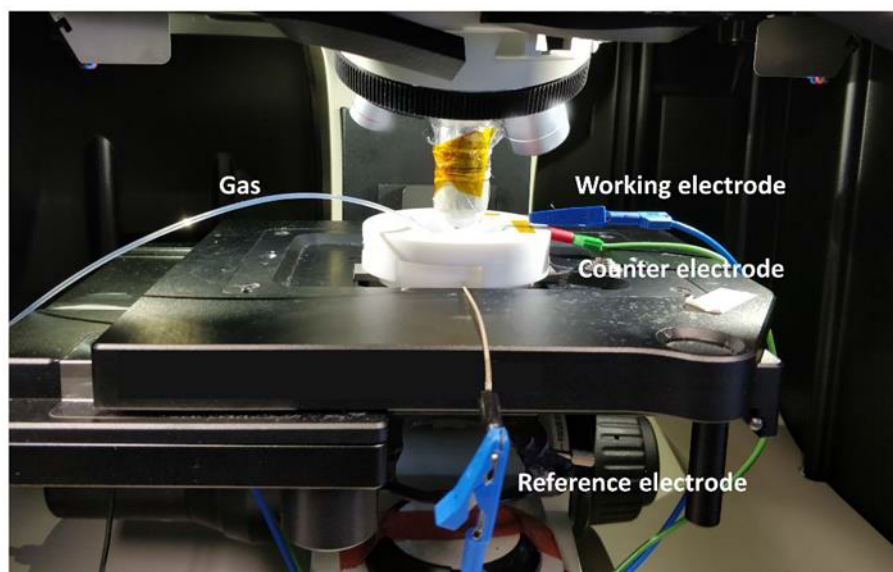

Supplementary Figure 7. The photograph of the in-situ Raman set-up.<sup>9</sup>

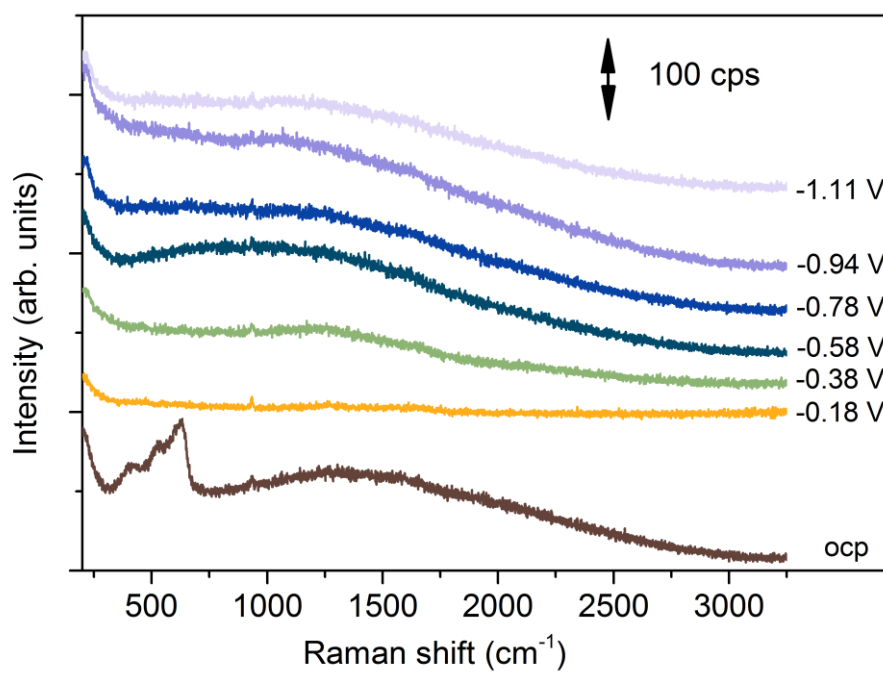

Supplementary Figure 8. Electrochemical Raman spectra of the electrochemically-polished Cu foil electrodes at potentials from OCP to  $-1.11 V_{\text{RHE}}$  in an Ar-saturated 0.1 M  $\text{NaClO}_4$  solution.

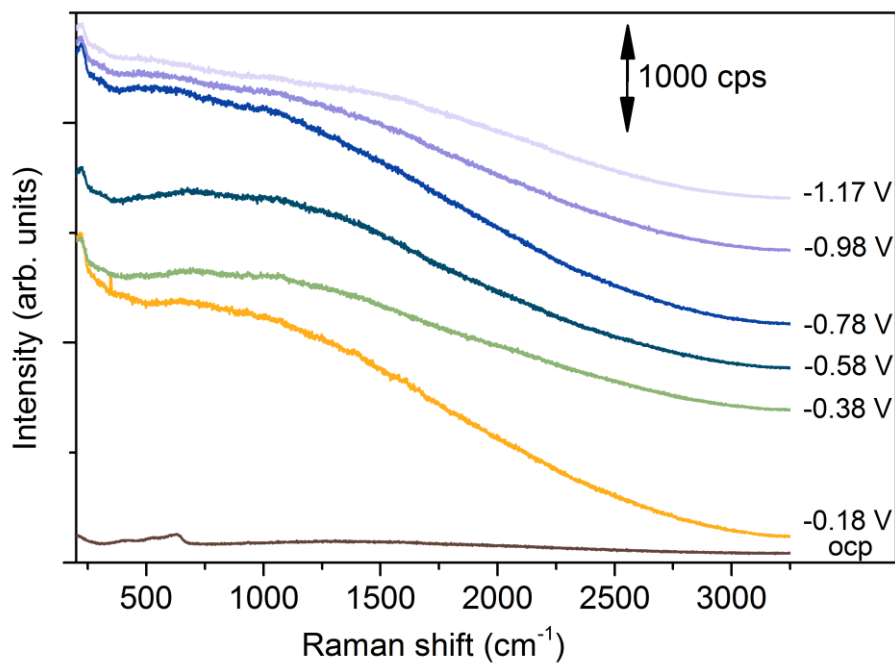

Supplementary Figure 9. Electrochemical surface-enhanced Raman spectra of the electrochemically-treated Cu foil electrode at potentials from OCP to  $-1.17 V_{\text{RHE}}$  in an Ar-saturated 0.1 M  $\text{NaClO}_4$  solution.

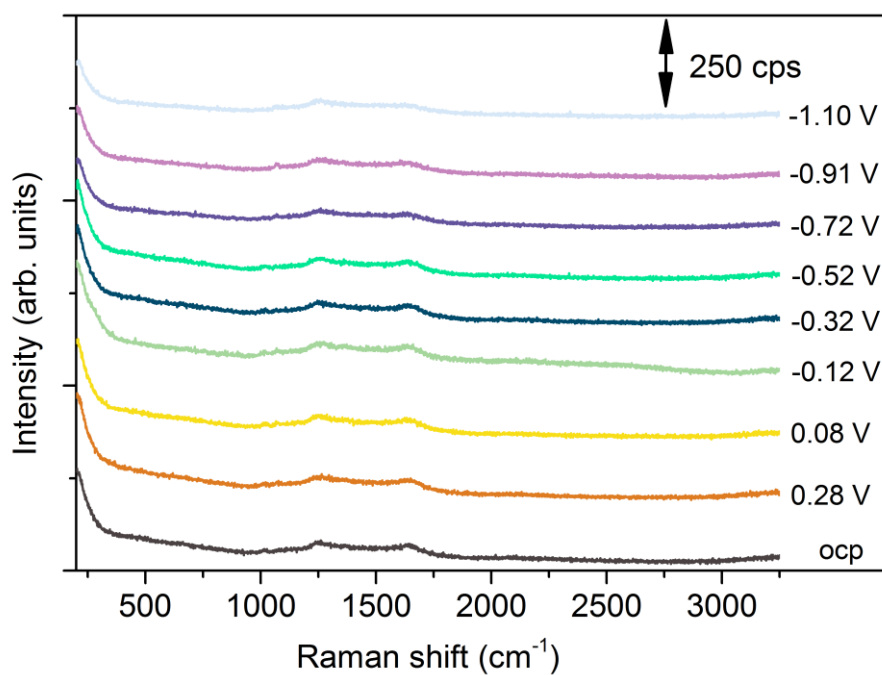

Supplementary Figure 10. Electrochemical Raman spectra of the electrochemically-polished Cu foil electrode at potentials from OCP to  $-1.10 V_{\text{RHE}}$  in an Ar-saturated 0.1 M  $\text{KHCO}_3$  solution.

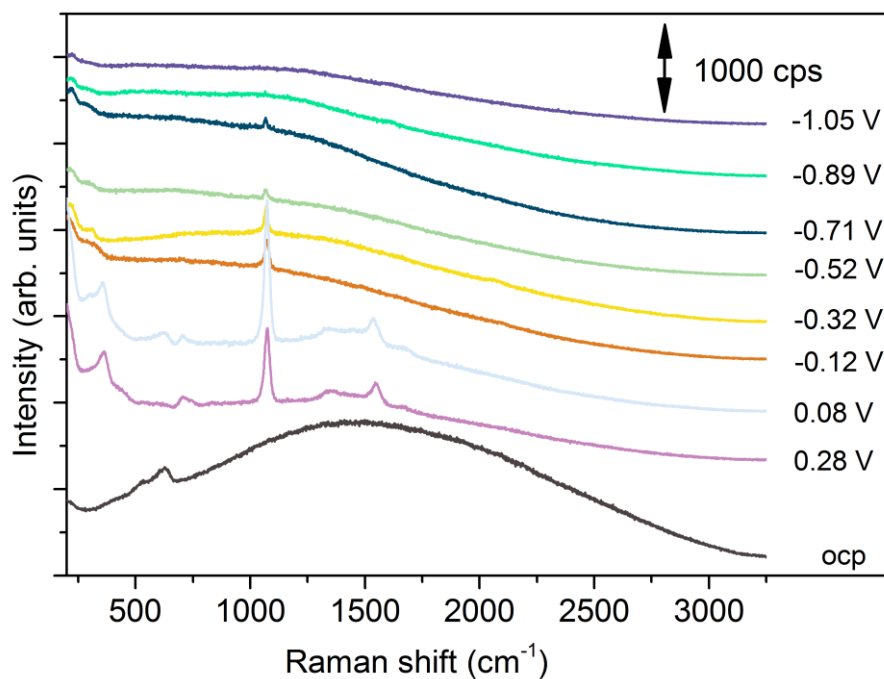

Supplementary Figure 11. Electrochemical surface-enhanced Raman spectra of the electrochemically-treated Cu foil electrode at potentials from OCP to  $-1.05 V_{RHE}$  in an Ar-saturated 0.1 M  $KHCO_3$  solution.

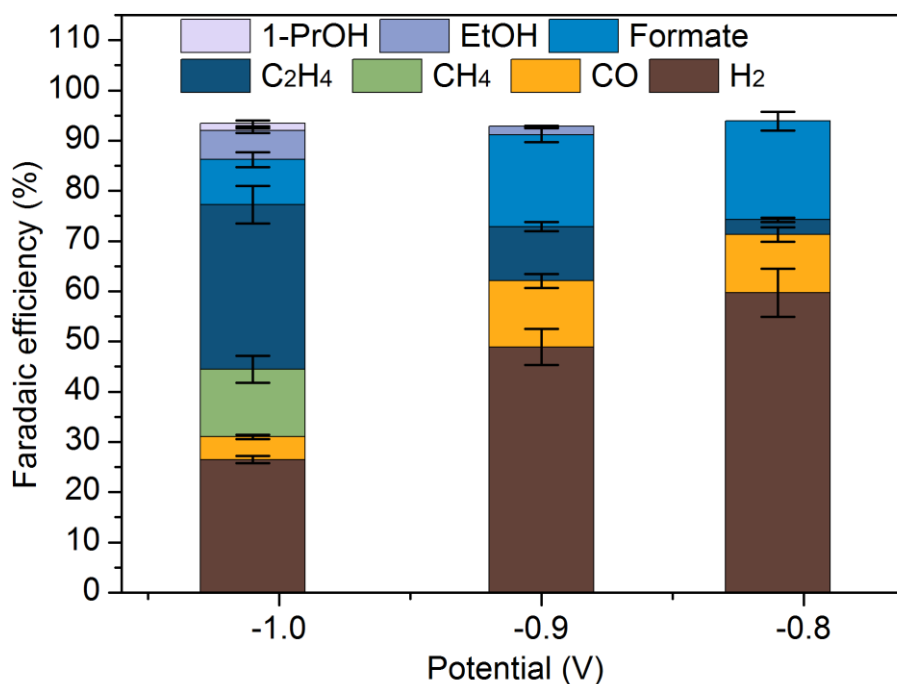

Supplementary Figure 12. Potential-dependent Faradaic efficiency of the electrochemically-treated Cu foil electrode in  $CO_2$ -saturated 0.1M  $NaClO_4$ . The error bars correspond to the standard deviation (SD) of three independent measurements. Data are given as averages  $\pm$  SD.

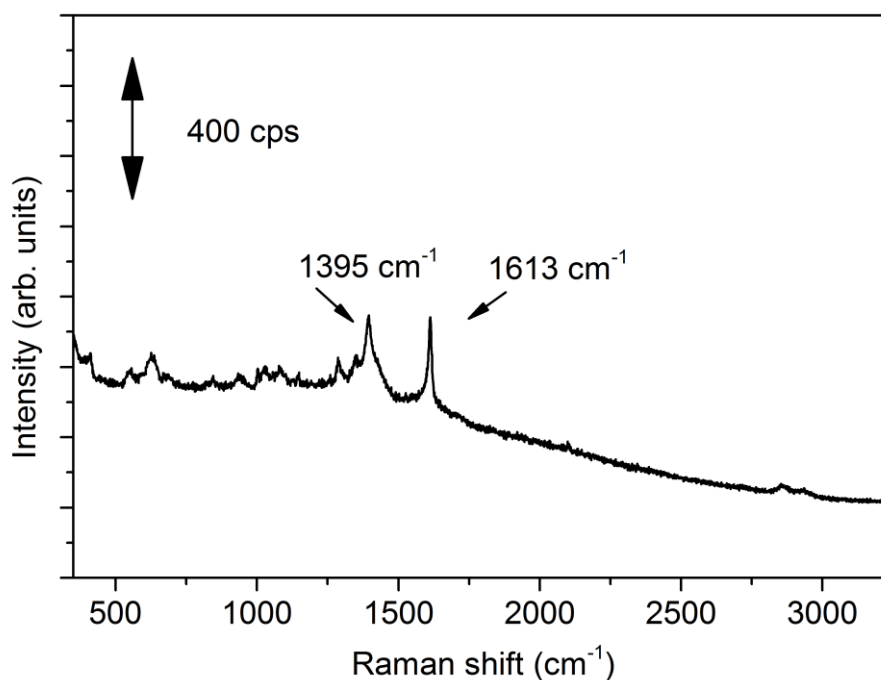

Supplementary Figure 13. Electrochemical surface-enhanced Raman spectrum of an electrochemically-treated Cu foil electrode at  $-0.4 V_{\text{RHE}}$  in an Ar-saturated 0.1 M 0.1 M  $\text{NaClO}_4$  with 1 mM  $\text{HCOOH}$  solution.

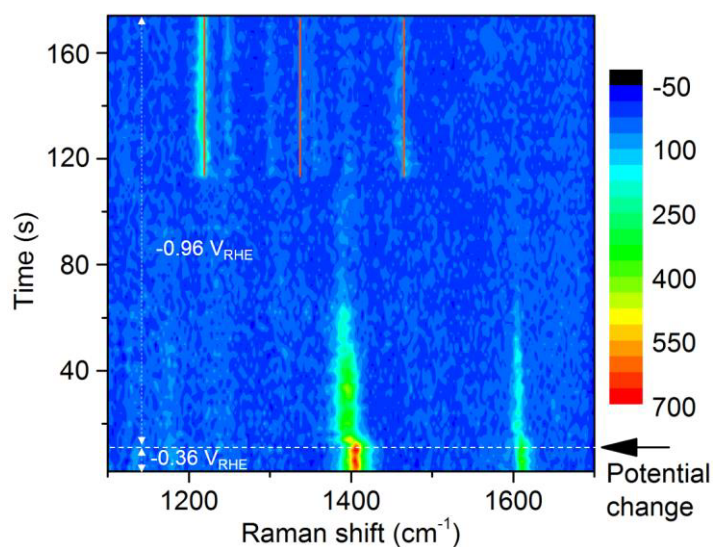

Supplementary Figure 14. Time-dependent Raman spectra of an electrochemically-treated Cu foil acquired during the potential changing from  $-0.36 V_{\text{RHE}}$  to  $-0.96 V_{\text{RHE}}$  in  $\text{CO}_2$ -saturated 0.1 M  $\text{NaClO}_4$  electrolyte. The acquisition time was 2 s. Time-dependent Raman spectroscopy measurements were performed to track the initial changes under  $\text{CO}_2\text{RR}$  with a time resolution of 2 s. Although the data quality was low for the time-resolved experiments, it can be observed that the peaks of the  $^*\text{HCOO}^-/^*\text{HCOOH}$  at  $\sim 1390 \text{ cm}^{-1}$  and  $1410 \text{ cm}^{-1}$  as well as of the C-C coupling intermediate  $\text{OCHCH}_2$  at about  $1200 \text{ cm}^{-1}$ ,  $1320 \text{ cm}^{-1}$  and  $1450 \text{ cm}^{-1}$  appear simultaneously. Interestingly, when we changed the potential from  $-0.36 V_{\text{RHE}}$  to  $-0.96 V_{\text{RHE}}$ , the peaks assigned to  $^*\text{HCOO}^-/^*\text{HCOOH}$  immediately shifted to lower wavenumbers due to the electrochemical Stark effect and gradually decreased in intensity. It takes 80 s after applying the  $\text{CO}_2\text{RR}$  potential until these peaks disappeared completely and the peaks assigned to the C-C coupling intermediate appeared.



**a** Distorted domains (Oxide-derived copper model)

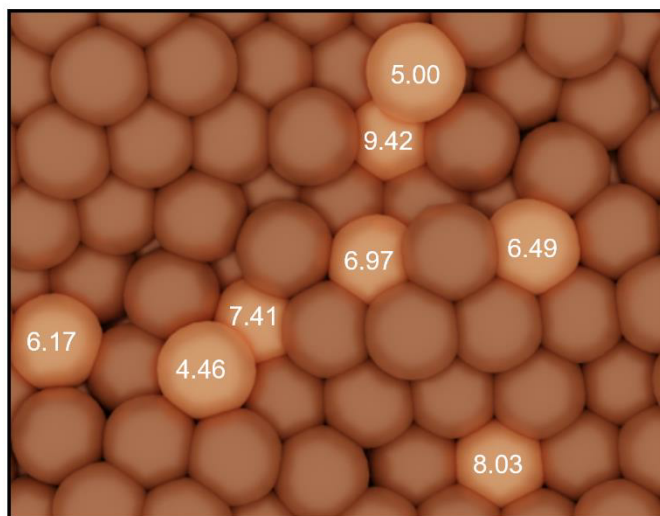

**b** Crystalline domain (Cu(100) model)

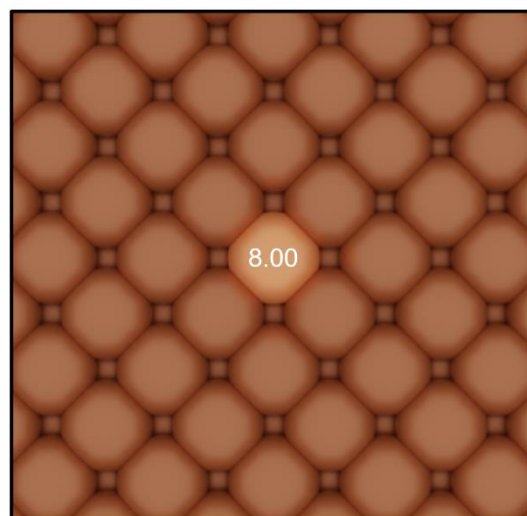

Supplementary Figure 15. Models for (a) distorted domains (Ref.[<sup>10</sup>]) and (b) crystalline domain, i.e. Cu(100) p(3×3), with active sites highlighted in light brown and Cu-Cu coordination numbers indicated in white.

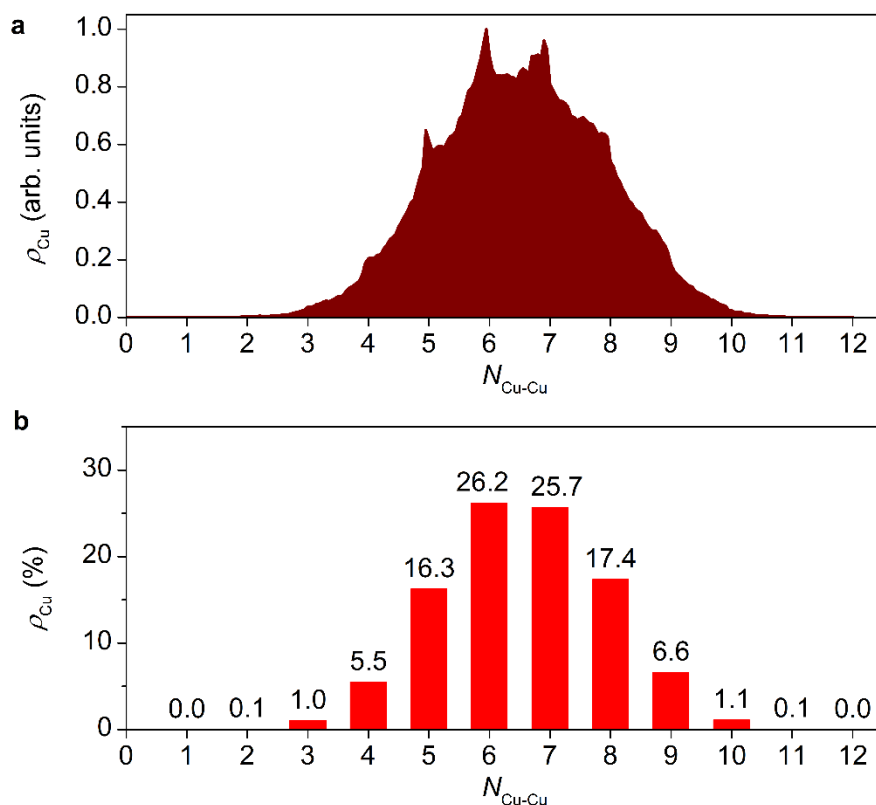

Supplementary Figure 16. (a) Cu-Cu coordination number cumulative map for surface sites of the OD-Cu model during 5 ps ab initio molecular dynamics simulation.<sup>8</sup> (b) Abundance (%) of Cu sites with given coordination numbers, calculated as integral of (a) within  $(-0.5 N_{\text{Cu-Cu}}, +0.5 N_{\text{Cu-Cu}})$ , e.g. 3.5, 4.5 for  $N_{\text{Cu-Cu}} = 4$ .

**STEP 1**

▼ ROOT  
   ├─ frequencies (1)  
   └─ redCO2 (1)

**STEP 2**

| Preview                                                                            | Title              |
|------------------------------------------------------------------------------------|--------------------|
|  | freq-OD-Cu-R30-CO2 |

**STEP 3**

View data

**STEP 4**

Eigenvalues

Vibrational frequencies

**STEP 5**

Eigenvalues

Vibrational frequencies

Load vibrations

**STEP 6**

Vibrational frequencies

Choose frequency: 1512.972168 cm-1 ▼

**unspecified! #1**  
 a=22.251Å  
 b=22.251Å  
 c=24.381Å  
 α=90.000°  
 β=90.000°  
 γ=120.000°

Left click to rotate



Supplementary Figure 17. Tutorial on how to visualize vibrational frequencies for a given reaction intermediate on ioChem-BD.<sup>11</sup>

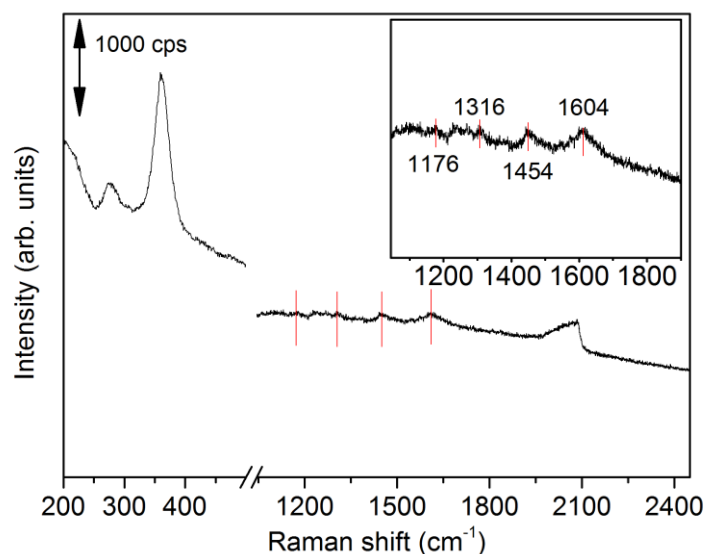

Supplementary Figure 18. In-situ Raman spectra of an electrochemically-treated Cu foil acquired during CO electrochemical reduction at about  $-1.0 V_{RHE}$  in a CO-saturated 0.1 M NaClO<sub>4</sub> electrolyte.

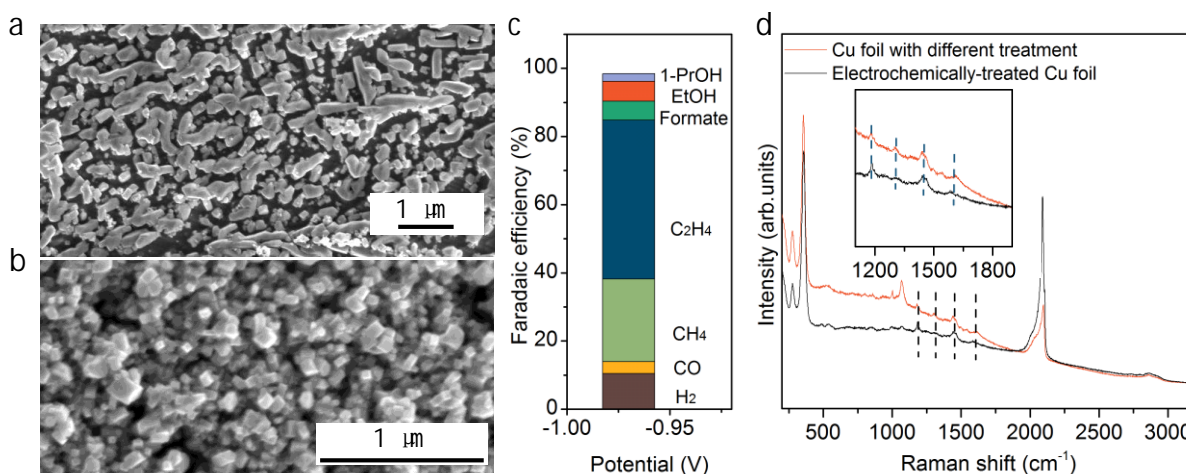

Supplementary Figure 19. (a) SEM image of a Cu foil electrode with that was subjected to a different electrochemical pre-treatment as that utilized in the rest of the manuscript (2 cyclic voltammograms, gas-saturated 0.1 M NaClO<sub>4</sub>, 10 mV/s,  $-1.3 V_{RHE}$  to  $+0.5 V_{RHE}$ ), (b) SEM image of Cu foil electrode used in the main text as comparison. (c) Faradaic efficiency of the differently pre-treated Cu foil electrode in CO<sub>2</sub>-saturated 0.1M KHCO<sub>3</sub> electrolyte for 1 h at  $-0.97 V_{RHE}$ . (d) Raman spectra of the two differently pre-treated Cu foils acquired at  $-0.95 V_{RHE}$  during CO<sub>2</sub>RR in a CO<sub>2</sub>-saturated 0.1 M NaClO<sub>4</sub> electrolyte.

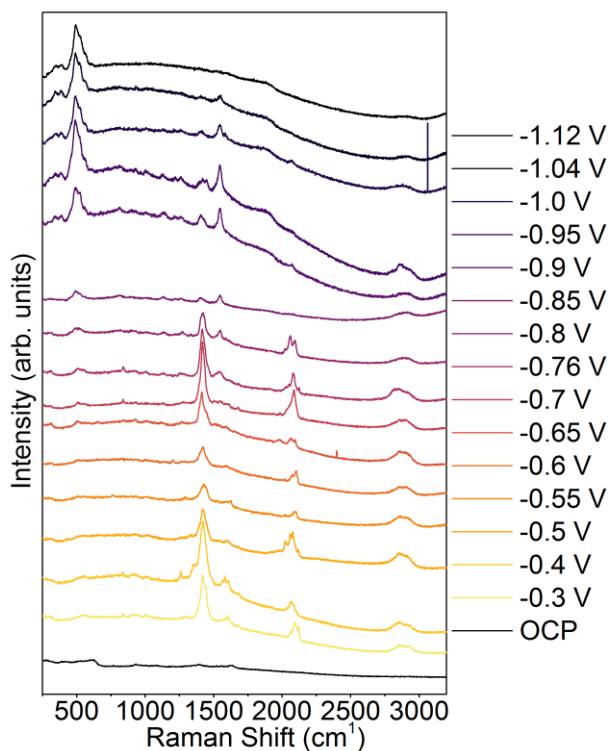

Supplementary Figure 20. Surface-enhanced Raman spectra of an electrochemically-treated Cu foil electrode acquired during glyoxal reduction at potentials from OCP to  $-1.1 V_{RHE}$  in an Ar-saturated  $0.1 M NaClO_4$  solution with  $0.05 M$  glyoxal.

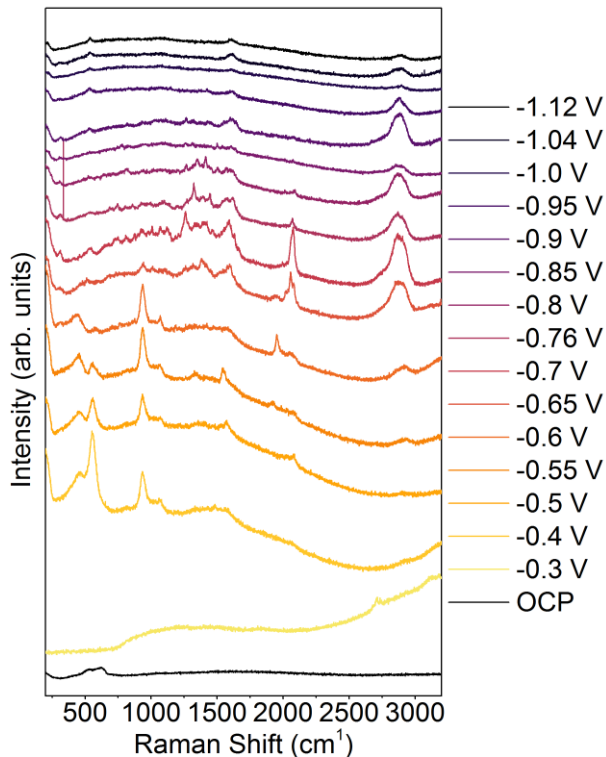

Supplementary Figure 21. Surface-enhanced Raman spectra of an electrochemically-treated Cu foil electrode acquired during ethanol reduction at potentials from OCP to  $-1.1 V_{RHE}$  in an Ar-saturated  $0.1 M NaClO_4$  solution with  $0.05 M$  ethanol.

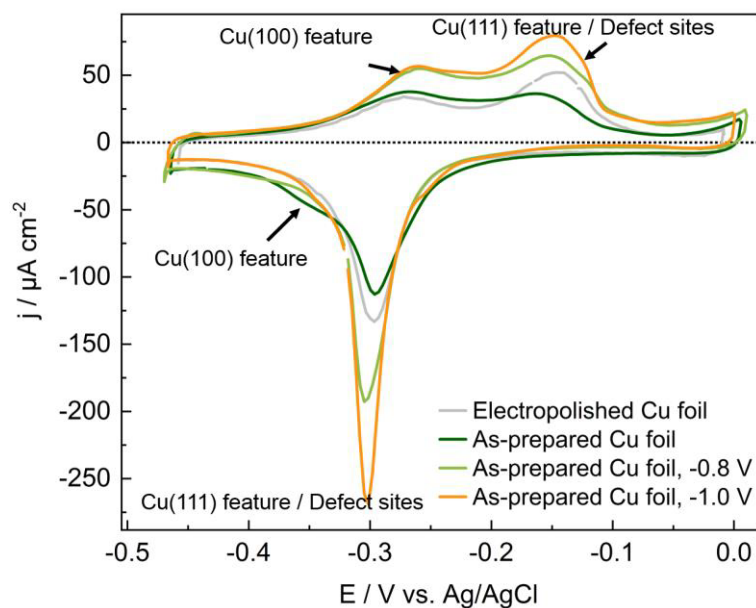

Supplementary Figure 22. The Pb UPD experiments of the Cu foil before and upon CO<sub>2</sub>RR at -0.8 and -1.0 V<sub>RHE</sub> for one hour. Pb UPD was conducted in a Ar-saturated solution of 0.1 M NaClO<sub>4</sub>, 10 mM HClO<sub>4</sub>, and 3 mM Pb(ClO<sub>4</sub>)<sub>2</sub>. The scan rate is 10 mV/s. From the Pb UPD experiments of the Cu surfaces before and upon 1h CO<sub>2</sub>RR at -0.8 and -1.0 V, it is clear that the anodic feature at about -0.16 V<sub>Ag/AgCl</sub> (which can be correlated to defective Cu sites or Cu(111))<sup>12,13</sup> is suppressed as the cathodic feature at -0.35 V<sub>Ag/AgCl</sub> (which can be correlated to Cu(100) sites)<sup>12,13</sup> becomes more pronounced after electrochemically-treating the Cu Foil in 0.1M NaClO<sub>4</sub>. However, these features recover and become more obvious after CO<sub>2</sub>RR at -0.8 and -1.0 V. Additionally, compared with the -0.8 V case, there are more defective Cu sites on the electrochemically-treated Cu electrode after CO<sub>2</sub>RR at -1.0 V, in agreement to the cyclic voltammetry experiments.

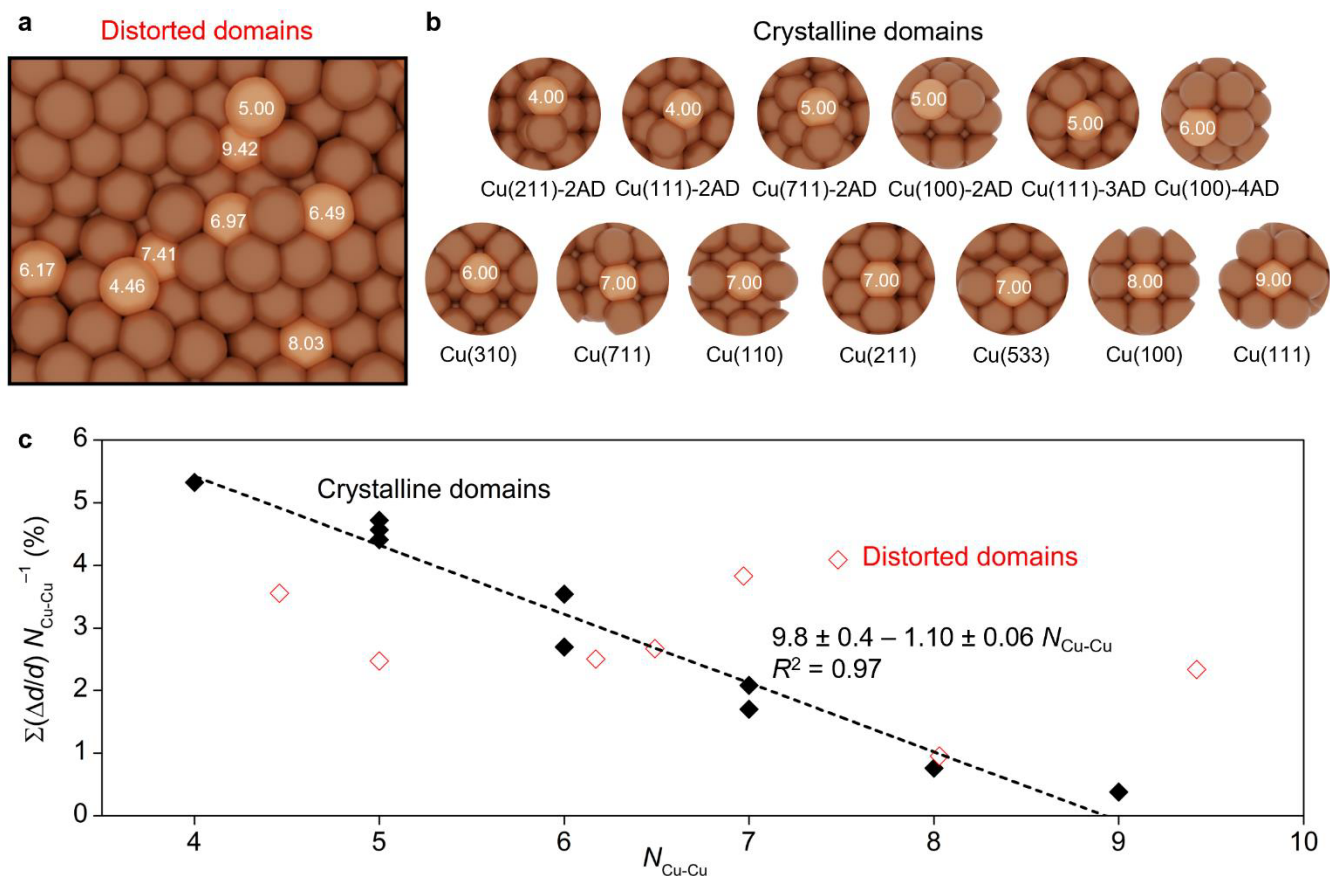

Supplementary Figure 23. (a) Models for distorted domains (Ref.[<sup>10</sup>]) and (b) crystalline facet, i.e. Cu(100), with active sites highlighted in light brown and Cu-Cu coordination numbers indicated in white. (c) Correlation between  $\Sigma(\Delta d/d) N_{\text{Cu-Cu}}^{-1}$  and  $N_{\text{Cu-Cu}}$  for crystalline (black filled points) and distorted sites (red empty points).

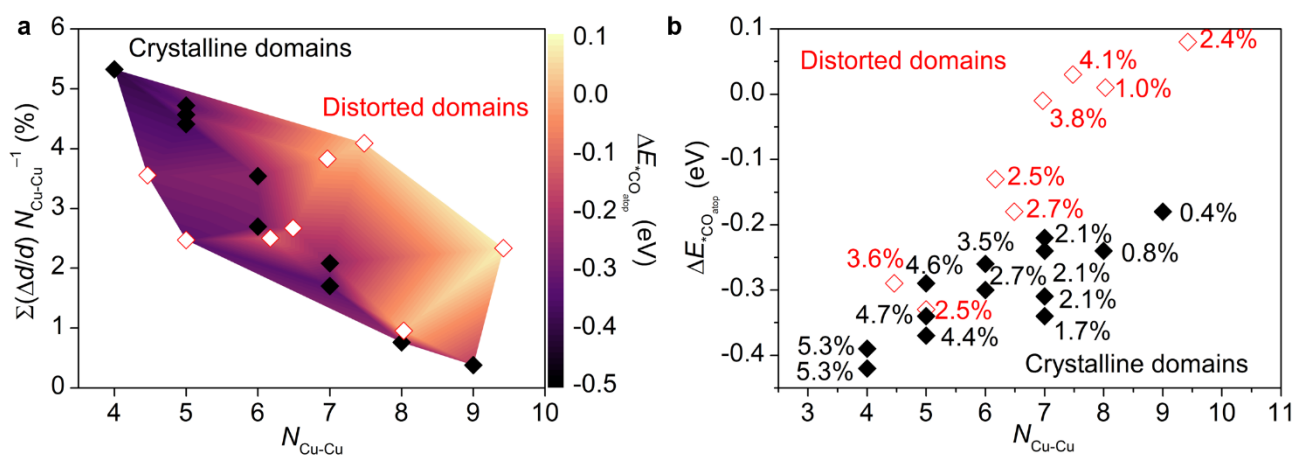

Supplementary Figure 24. (a) DFT adsorption energy for  $^*\text{CO}$  atop on crystalline (black filled points, Supplementary Figure 15b) and distorted domains (red empty points, Supplementary Figure 15a) vs Cu-Cu coordination number ( $N_{\text{Cu-Cu}}$ , x-axis) and compressive strain normalized by Cu coordination number ( $\Sigma(\Delta d/d) N_{\text{Cu-Cu}}^{-1}$ , y-axis). Darker areas correspond to stronger binding energy. (b) Correlation of  $^*\text{CO}$  atop binding energies on crystalline and distorted sites vs Cu-Cu coordination number. Values of compressive strain normalized by Cu coordination number are included as labels.

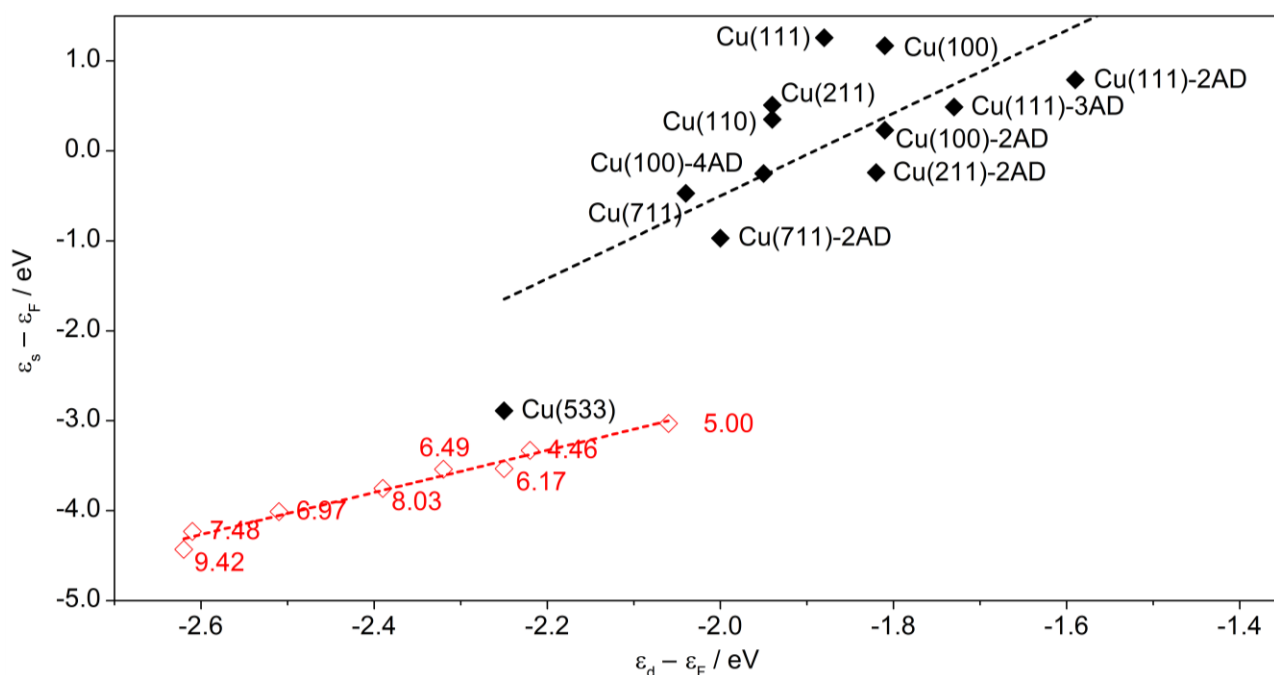

Supplementary Figure 25. Linear correlation between s-band center (vs Fermi energy,  $\epsilon_s - \epsilon_F$ ) and d-band center (vs Fermi energy,  $\epsilon_d - \epsilon_F$ ) for distorted sites (red empty data points) and crystalline domains (black filled data points). Fitting parameters are reported in Supplementary Table 17.

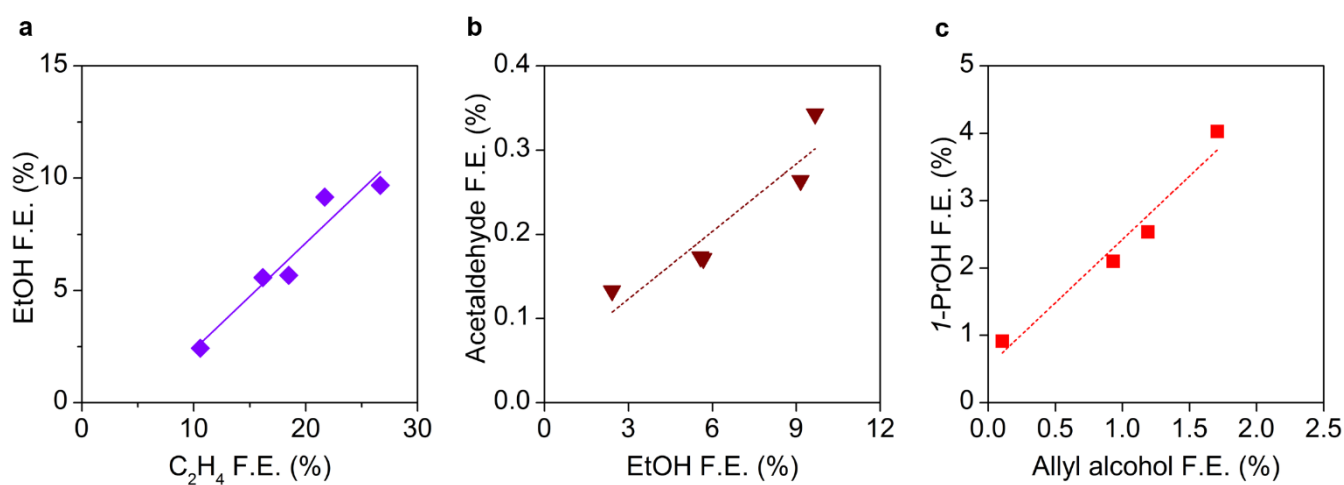

Supplementary Figure 26. (a) Correlation between ethanol and ethylene selectivities. (b) Correlation between acetaldehyde and ethanol selectivities. (c) Correlation between 1-propanol and allyl alcohol selectivities. Values of Faradaic efficiencies were measured between  $-0.75$  V vs RHE and  $-1.2$  V vs RHE during  $\text{CO}_2$  electrolysis on a  $1.5 \text{ cm} \times 3 \text{ cm}$  Cu working electrode in  $0.1 \text{ M}$  solution of  $\text{KHCO}_3$  (bulk pH = 6.8).<sup>4</sup> Fitting parameters are reported in Supplementary Table 19.



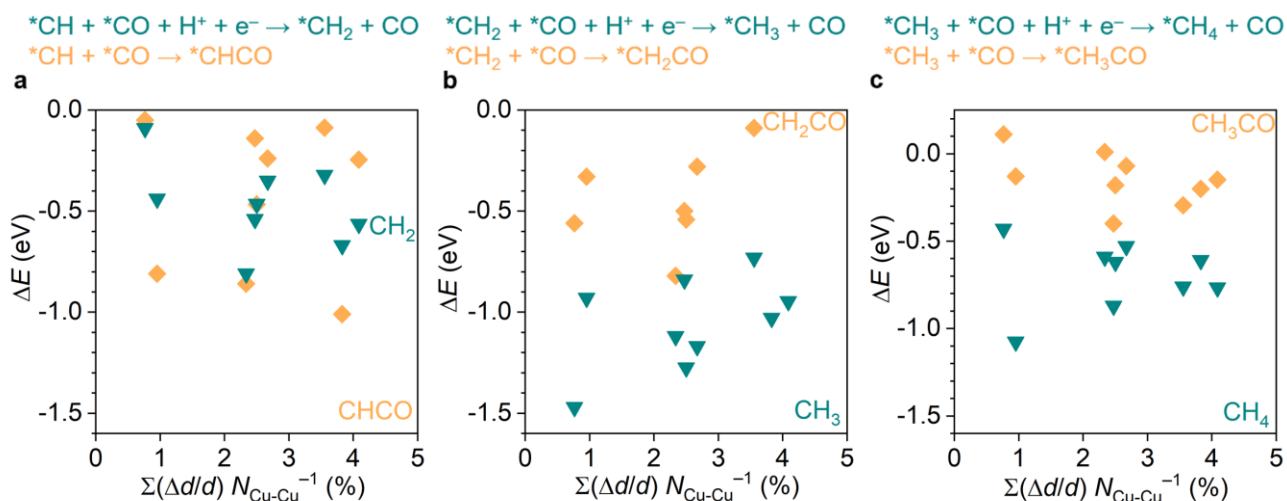

Supplementary Figure 27. DFT energy associated with the  $\text{CH}_x\text{-CO}$  coupling step toward ethanol precursors (cyan) vs  $\text{CH}_x$  protonation to methane on distorted domains (orange). In the figure  $x = 1, 2, 3$  for panels a, b, c, respectively.

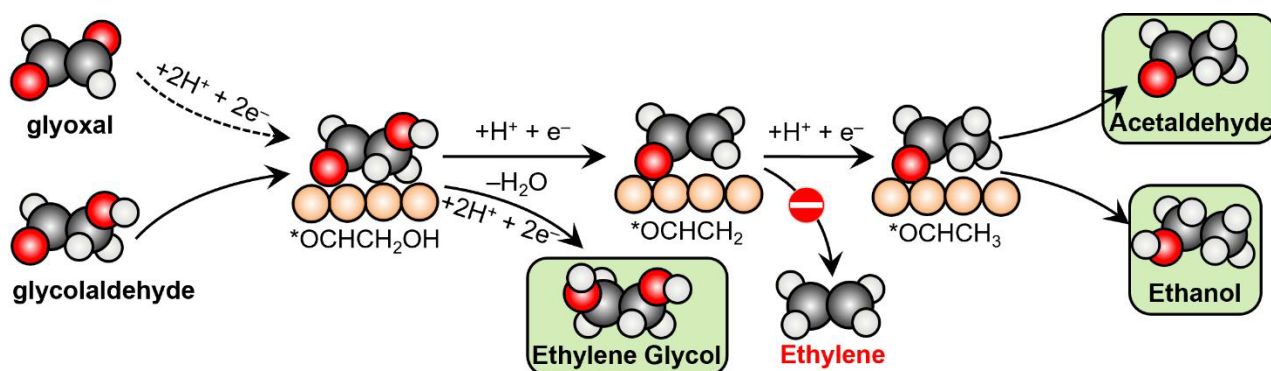

Supplementary Figure 28. Reaction scheme for glyoxal and glycolaldehyde reduction toward acetaldehyde and ethanol, as proposed in Ref. [5].



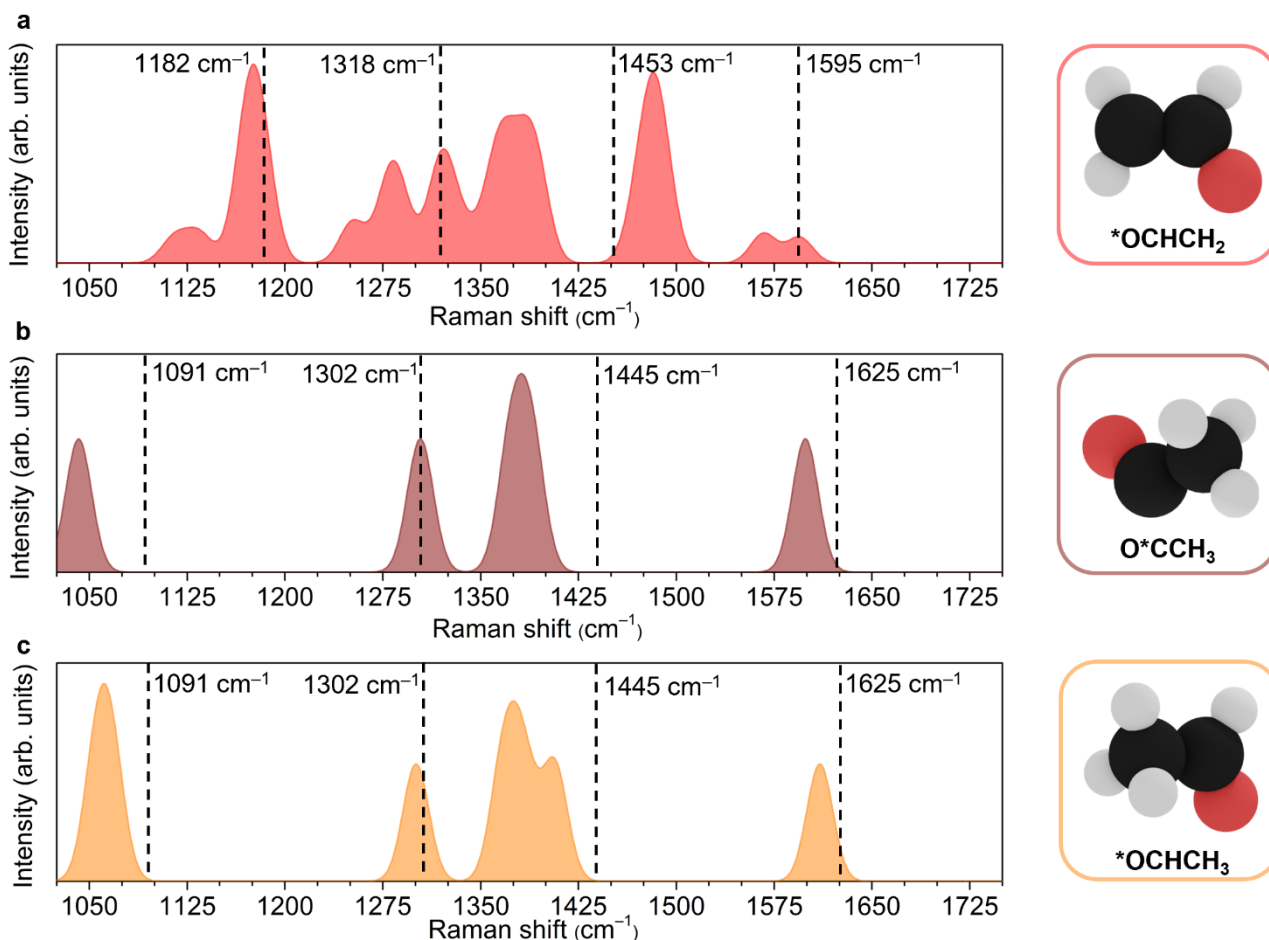

Supplementary Figure 29. Vibrational frequencies for intermediates toward ethanol and 1-propanol: (a)  $^*\text{OCHCH}_2$  on distorted Cu sites proposed in this study, and (b)  $\text{O}^*\text{CCH}_3$  on Cu(100), proposed in Refs.<sup>14,15</sup>. (c) Vibrational frequencies of adsorbed acetaldehyde on Cu(100) are reported for comparison. Experimental signals are highlighted by vertical dashed lines and are taken from this study (Fig.2c), Ref.<sup>[15]</sup> (1091  $\text{cm}^{-1}$ ), and Ref.<sup>[14]</sup> (1302  $\text{cm}^{-1}$ , 1445  $\text{cm}^{-1}$ , 1625  $\text{cm}^{-1}$ ). Theoretical Raman spectra were achieved by applying a smearing of 10  $\text{cm}^{-1}$  on each DFT frequency and overlapping the resulting peaks. Vibrational modes can be visualized at links (a) <https://iochem-bd.iciq.es/browse/handle/100/40738>, (b) <https://iochem-bd.iciq.es/browse/handle/100/59928>, and (c) <https://iochem-bd.iciq.es/browse/handle/100/40732> respectively.

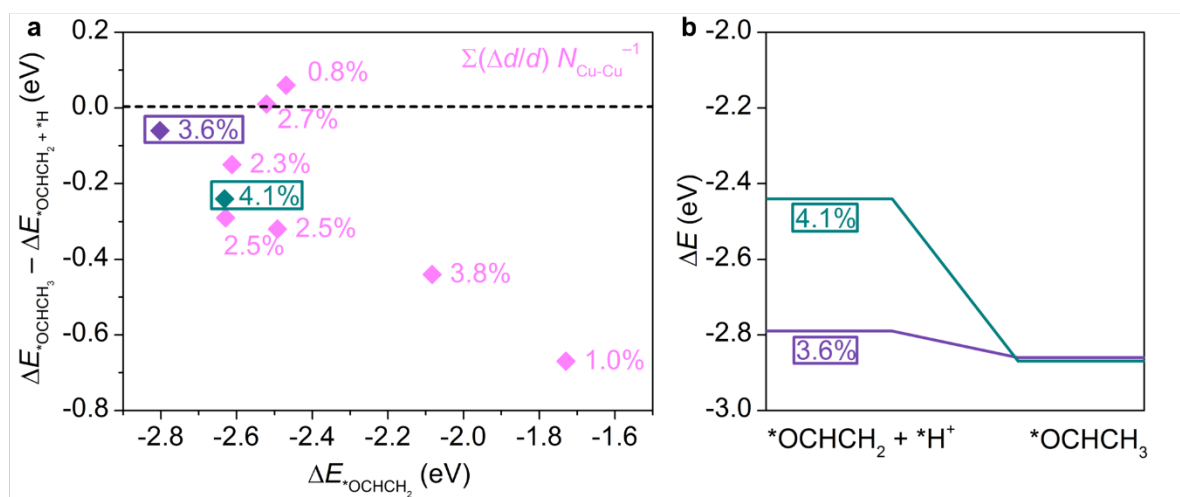

Supplementary Figure 30. (a) DFT energy associated with  $*\text{OCHCH}_2$  protonation to  $*\text{OCHCH}_3$  on distorted domains. Data labels indicate the associated 3-D strain of each site. The 3.6% and 4.1% 3-D strain data points are highlighted by purple and green boxes respectively. (b) Gibbs free energy diagrams for  $*\text{OCHCH}_2$  protonation to  $*\text{OCHCH}_3$  on previously selected highly strained active sites.

## Supplementary Tables

Supplementary Table 1: PBE-D2 vibrational frequencies (in  $\text{cm}^{-1}$ ) calculated for  $^*\text{CO}_3^{2-}$  on different active sites (Supplementary Figure 15). Gray area indicates unstable configurations. Vibrational modes can be visualized in the ioChem-BD database (see Supplementary Figure 17 for details).<sup>16</sup> For instance, vibrational modes of adsorbates on Cu(100) are accessible at Ref. [17].

| Model              | Oxide-derived copper |      |      |      |      |      |      |      | Cu(100) |      |
|--------------------|----------------------|------|------|------|------|------|------|------|---------|------|
|                    | $N_{\text{Cu-Cu}}$   | 4.46 | 5.00 | 6.17 | 6.49 | 6.97 | 7.48 | 8.03 |         | 9.42 |
| $\text{CO}_3^{2-}$ | 1637                 | 1621 | 1676 |      |      |      | 1705 |      | 1524    | 1712 |
|                    | 1079                 | 1124 | 993  |      |      |      | 1166 |      | 1214    | 979  |
|                    | 845                  | 827  | 908  |      |      |      | 763  |      | 939     | 906  |
|                    | 769                  | 764  | 769  |      |      |      | 751  |      | 772     | 775  |
|                    | 674                  | 670  | 652  |      |      |      | 667  |      | 687     | 654  |
|                    | 592                  | 562  | 599  |      |      |      | 587  |      | 633     | 601  |
|                    | 316                  | 318  | 271  |      |      |      | 304  |      | 282     | 284  |
|                    | 288                  | 238  | 253  |      |      |      | 294  |      | 255     | 279  |
|                    | 220                  | 155  | 226  |      |      |      | 184  |      | 215     | 246  |
|                    | 103                  | 127  | 202  |      |      |      | 167  |      | 181     | 211  |
|                    | 71                   | 79   | 113  |      |      |      | 104  |      | 167     | 101  |
|                    | 53                   | 48   | 89   |      |      |      | 71   |      | 109     | 85   |

Supplementary Table 2: PBE-D2 vibrational frequencies (in  $\text{cm}^{-1}$ ) calculated for  $\text{HCOO}^-$  on different active sites (Supplementary Figure 15). Vibrational modes can be visualized in the ioChem-BD database (see Supplementary Figure 17 for details).<sup>16</sup> For instance, vibrational modes of adsorbates on Cu(100) are accessible at Ref. [18].

| Model           | Oxide-derived copper |      |      |      |      |      |      |      | Cu(100) |
|-----------------|----------------------|------|------|------|------|------|------|------|---------|
|                 | $N_{\text{Cu-Cu}}$   | 4.46 | 5.00 | 6.17 | 6.49 | 6.97 | 7.48 | 8.03 |         |
| $\text{HCOO}^-$ | 2951                 | 2936 |      | 2948 | 2953 | 2939 | 2945 | 2932 | 2913    |
|                 | 1540                 | 1543 |      | 1538 | 1517 | 1540 | 1526 | 1541 | 1664    |
|                 | 1341                 | 1350 |      | 1327 | 1318 | 1340 | 1321 | 1350 | 1300    |
|                 | 1317                 | 1318 |      | 1316 | 1300 | 1318 | 1308 | 1317 | 1112    |
|                 | 985                  | 990  |      | 995  | 985  | 989  | 985  | 992  | 981     |
|                 | 720                  | 712  |      | 745  | 739  | 728  | 740  | 713  | 708     |
|                 | 341                  | 335  |      | 331  | 303  | 339  | 307  | 336  | 217     |
|                 | 294                  | 304  |      | 317  | 291  | 316  | 296  | 308  | 178     |
|                 | 279                  | 276  |      | 304  | 263  | 288  | 265  | 278  | 112     |
|                 | 125                  | 124  |      | 125  | 119  | 124  | 111  | 122  | 79      |
|                 | 115                  | 110  |      | 108  | 90   | 109  | 105  | 120  | 40      |
|                 | 91                   | 103  |      | 93   | 77   | 88   | 92   | 99   | -       |

Supplementary Table 3: PBE-D2 vibrational frequencies (in  $\text{cm}^{-1}$ ) calculated for HCOOH on different active sites (Supplementary Figure 15). Vibrational modes can be visualized in the ioChem-BD database (see Supplementary Figure 17 for details).<sup>16</sup> For instance, vibrational modes of adsorbates on Cu(100) are accessible at Ref. [19].

| Model              | Oxide-derived copper |      |      |      |      |      |      |      | Cu(100) |
|--------------------|----------------------|------|------|------|------|------|------|------|---------|
| $N_{\text{Cu-Cu}}$ | 4.46                 | 5.00 | 6.17 | 6.49 | 6.97 | 7.48 | 8.03 | 9.42 | 8.00    |
| HCOOH              | 3101                 | 3094 | 3039 | 3029 | 3046 | 3530 | 3147 | 3078 | 3253    |
|                    | 3024                 | 3021 | 2993 | 2963 | 3001 | 2997 | 3010 | 3019 | 2972    |
|                    | 1650                 | 1645 | 1646 | 1649 | 1644 | 1768 | 1650 | 1642 | 1700    |
|                    | 1356                 | 1360 | 1354 | 1353 | 1359 | 1344 | 1360 | 1361 | 1352    |
|                    | 1303                 | 1301 | 1300 | 1292 | 1299 | 1221 | 1289 | 1304 | 1266    |
|                    | 1144                 | 1140 | 1144 | 1145 | 1146 | 1006 | 1135 | 1139 | 1110    |
|                    | 994                  | 999  | 995  | 996  | 996  | 975  | 993  | 996  | 999     |
|                    | 703                  | 717  | 708  | 714  | 720  | 663  | 680  | 714  | 697     |
|                    | 655                  | 651  | 652  | 650  | 655  | 601  | 644  | 650  | 628     |
|                    | 246                  | 258  | 238  | 228  | 248  | 195  | 218  | 264  | 140     |
|                    | 227                  | 236  | 220  | 207  | 232  | 146  | 204  | 229  | 104     |
|                    | 130                  | 118  | 135  | 143  | 144  | 85   | 140  | 143  | 73      |
|                    | 97                   | 103  | 95   | 98   | 95   | 56   | 105  | 98   | 49      |
|                    | 74                   | 82   | 92   | 69   | 81   | 38   | 81   | 88   | 39      |
|                    | 44                   | 75   | 70   | 28   | 55   |      | 66   | 63   | 14      |

Supplementary Table 4: PBE-D2 vibrational frequencies (in  $\text{cm}^{-1}$ ) calculated for \*OCCO on different active sites (Supplementary Figure 15). Gray area indicates unstable configurations. Vibrational modes can be visualized in the ioChem-BD database (see Supplementary Figure 17 for details).<sup>16</sup> For instance, vibrational modes of adsorbates on Cu(100) are accessible at Ref. [20].

| Model              | Oxide-derived copper |      |      |      |      |      |      |      | Cu(100) |
|--------------------|----------------------|------|------|------|------|------|------|------|---------|
| $N_{\text{Cu-Cu}}$ | 4.46                 | 5.00 | 6.17 | 6.49 | 6.97 | 7.48 | 8.03 | 9.42 | 8.00    |
| *OCCO              |                      | 1996 |      | 1773 | 1689 | 1700 |      | 1481 | 2015    |
|                    |                      | 1399 |      | 1382 | 1456 | 1412 |      | 1434 | 1210    |
|                    |                      | 882  |      | 690  | 595  | 683  |      | 766  | 861     |
|                    |                      | 541  |      | 568  | 472  | 587  |      | 549  | 606     |
|                    |                      | 362  |      | 437  | 320  | 511  |      | 482  | 397     |
|                    |                      | 319  |      | 331  | 285  | 342  |      | 337  | 367     |
|                    |                      | 306  |      | 299  | 252  | 304  |      | 304  | 327     |
|                    |                      | 285  |      | 229  | 202  | 239  |      | 271  | 296     |
|                    |                      | 145  |      | 171  | 189  | 198  |      | 187  | 258     |
|                    |                      | 95   |      | 136  | 104  | 144  |      | 126  | 152     |
|                    |                      | 80   |      | 83   | 81   | 129  |      | 113  | 82      |
|                    |                      | 45   |      | 25   | 49   | 74   |      | 100  | 52      |

Supplementary Table 5: PBE-D2 vibrational frequencies (in  $\text{cm}^{-1}$ ) calculated for \*OCCOH on different active sites (Supplementary Figure 15). Vibrational modes can be visualized in the ioChem-BD database (see Supplementary Figure 17 for details).<sup>14</sup> For instance, vibrational modes of adsorbates on Cu(100) are accessible at Ref. [21].

| Model              | Oxide-derived copper |      |      |      |      |      |      |      | Cu(100) |
|--------------------|----------------------|------|------|------|------|------|------|------|---------|
| $N_{\text{Cu-Cu}}$ | 4.46                 | 5.00 | 6.17 | 6.49 | 6.97 | 7.48 | 8.03 | 9.42 | 8.00    |
| *OCCOH             | 3493                 | 3691 | 3642 | 3559 | 3464 | 3590 | 3519 | 3532 | 3626    |
|                    | 1577                 | 1965 | 2027 | 1531 | 1528 | 1373 | 1317 | 1952 | 2022    |
|                    | 1232                 | 1321 | 1217 | 1255 | 1251 | 1262 | 1256 | 1293 | 1189    |
|                    | 1054                 | 1247 | 1163 | 1056 | 1096 | 1082 | 1094 | 1230 | 1179    |
|                    | 843                  | 884  | 814  | 929  | 868  | 891  | 946  | 850  | 844     |
|                    | 726                  | 552  | 599  | 697  | 726  | 711  | 760  | 553  | 599     |
|                    | 542                  | 363  | 494  | 477  | 570  | 464  | 554  | 404  | 486     |
|                    | 476                  | 336  | 351  | 439  | 456  | 407  | 461  | 392  | 314     |
|                    | 297                  | 255  | 300  | 318  | 319  | 299  | 318  | 371  | 293     |
|                    | 265                  | 237  | 282  | 273  | 277  | 294  | 302  | 245  | 284     |
|                    | 239                  | 196  | 249  | 224  | 235  | 267  | 264  | 220  | 215     |
|                    | 199                  | 177  | 145  | 183  | 220  | 199  | 225  | 197  | 136     |
|                    | 148                  | 109  | 134  | 132  | 143  | 165  | 164  | 134  | 115     |
|                    | 129                  | 69   | 87   | 101  | 113  | 132  | 140  | 101  | 80      |
|                    | 81                   | 57   | 64   | 78   | 93   | 106  | 118  | 94   | 65      |

Supplementary Table 6: PBE-D2 vibrational frequencies (in  $\text{cm}^{-1}$ ) calculated for \*OCCO<sub>2</sub> on different active sites (Supplementary Figure 15). Gray area indicates unstable configurations. Vibrational modes can be visualized in the ioChem-BD database (see Supplementary Figure 17 for details).<sup>16</sup> For instance, vibrational modes of adsorbates on Cu(100) are accessible at Ref. [22].

| Model              | Oxide-derived copper |      |      |      |      |      |      |      | Cu(100) |
|--------------------|----------------------|------|------|------|------|------|------|------|---------|
| $N_{\text{Cu-Cu}}$ | 4.46                 | 5.00 | 6.17 | 6.49 | 6.97 | 7.48 | 8.03 | 9.42 | 8.00    |
| *OCCO <sub>2</sub> |                      |      | 1704 | 1759 | 1704 | 1733 | 1768 |      | 1707    |
|                    |                      |      | 1636 | 1747 | 1680 | 1513 | 1750 |      | 1684    |
|                    |                      |      | 1158 | 1160 | 1153 | 1203 | 1128 |      | 1078    |
|                    |                      |      | 789  | 673  | 753  | 772  | 702  |      | 781     |
|                    |                      |      | 734  | 655  | 700  | 746  | 641  |      | 727     |
|                    |                      |      | 561  | 617  | 581  | 562  | 529  |      | 562     |
|                    |                      |      | 530  | 416  | 541  | 541  | 468  |      | 531     |
|                    |                      |      | 335  | 305  | 339  | 394  | 312  |      | 355     |
|                    |                      |      | 226  | 296  | 251  | 293  | 237  |      | 248     |
|                    |                      |      | 225  | 237  | 218  | 235  | 198  |      | 234     |
|                    |                      |      | 210  | 182  | 202  | 193  | 188  |      | 194     |
|                    |                      |      | 117  | 77   | 114  | 176  | 77   |      | 148     |
|                    |                      |      | 92   | 69   | 91   | 121  | 69   |      | 96      |
|                    |                      |      | 66   | 68   | 76   | 80   | 52   |      | 89      |
|                    |                      |      | 37   | 62   | 67   | 73   | 23   |      | 58      |

Supplementary Table 7: PBE-D2 vibrational frequencies (in  $\text{cm}^{-1}$ ) calculated for  $^*\text{OCHCH}_2$  and  $^*\text{OCHCH}_3$  on different actives sites (Supplementary Figure 15). Vibrational modes can be visualized in the ioChem-BD database (see Supplementary Figure 17 for details).<sup>16</sup> Vibrational modes of adsorbates on Cu(100) are accessible at Refs. [23,24].

| Model<br>$N_{\text{Cu-Cu}}$ | Oxide-derived copper |      |      |      |      |      |      |      | Cu(100) |
|-----------------------------|----------------------|------|------|------|------|------|------|------|---------|
|                             | 4.46                 | 5.00 | 6.17 | 6.49 | 6.97 | 7.48 | 8.03 | 9.42 | 8.00    |
| $^*\text{OCHCH}_2$          | 3125                 | 3124 | 3135 | 3109 | 3178 | 3118 | 3167 | 3111 | 3150    |
|                             | 3013                 | 3027 | 3028 | 3045 | 3073 | 3010 | 3056 | 3014 | 3040    |
|                             | 2920                 | 2951 | 2966 | 2997 | 3031 | 2915 | 3026 | 2936 | 2943    |
|                             | 1484                 | 1487 | 1476 | 1486 | 1567 | 1482 | 1595 | 1494 | 1470    |
|                             | 1392                 | 1393 | 1380 | 1367 | 1365 | 1380 | 1354 | 1392 | 1365    |
|                             | 1316                 | 1323 | 1281 | 1278 | 1291 | 1321 | 1284 | 1336 | 1252    |
|                             | 1169                 | 1184 | 1185 | 1177 | 1134 | 1175 | 1115 | 1177 | 1168    |
|                             | 976                  | 978  | 972  | 950  | 937  | 978  | 929  | 984  | 952     |
|                             | 939                  | 937  | 917  | 905  | 931  | 917  | 922  | 938  | 902     |
|                             | 830                  | 831  | 819  | 823  | 784  | 828  | 815  | 824  | 819     |
|                             | 724                  | 750  | 736  | 735  | 689  | 733  | 691  | 730  | 732     |
|                             | 517                  | 513  | 532  | 515  | 530  | 499  | 530  | 510  | 521     |
|                             | 346                  | 355  | 329  | 327  | 285  | 361  | 266  | 354  | 348     |
|                             | 329                  | 333  | 284  | 288  | 228  | 327  | 235  | 321  | 285     |
|                             | 221                  | 238  | 237  | 229  | 148  | 240  | 194  | 232  | 246     |
|                             | 131                  | 106  | 167  | 176  | 127  | 119  | 134  | 114  | 179     |
|                             | 90                   | 89   | 135  | 121  | 103  | 87   | 107  | 104  | 129     |
|                             | 52                   | 47   | 93   | 107  | 62   | 79   | 98   | 68   | 101     |
| $^*\text{OCHCH}_3$          | 3047                 | 3055 | 3061 | 3091 | 3087 | 3099 | 3065 | 3097 | 3051    |
|                             | 3019                 | 3002 | 3020 | 3026 | 3006 | 3012 | 2985 | 3014 | 2980    |
|                             | 2932                 | 2926 | 2936 | 2945 | 2936 | 2946 | 2910 | 2892 | 2909    |
|                             | 2894                 | 2922 | 2912 | 2822 | 2861 | 2868 | 2785 | 2884 | 2827    |
|                             | 1655                 | 1647 | 1635 | 1619 | 1638 | 1629 | 1711 | 1606 | 1610    |
|                             | 1395                 | 1404 | 1405 | 1407 | 1403 | 1402 | 1406 | 1398 | 1407    |
|                             | 1385                 | 1381 | 1382 | 1392 | 1394 | 1392 | 1392 | 1372 | 1382    |
|                             | 1370                 | 1372 | 1364 | 1352 | 1364 | 1362 | 1363 | 1351 | 1368    |
|                             | 1316                 | 1317 | 1312 | 1314 | 1316 | 1317 | 1316 | 1303 | 1301    |
|                             | 1109                 | 1106 | 1103 | 1098 | 1106 | 1109 | 1098 | 1099 | 1067    |
|                             | 1070                 | 1067 | 1066 | 1046 | 1058 | 1065 | 1072 | 1047 | 1056    |
|                             | 881                  | 903  | 891  | 891  | 880  | 885  | 875  | 879  | 938     |
|                             | 729                  | 712  | 729  | 714  | 736  | 750  | 736  | 692  | 696     |
|                             | 520                  | 524  | 525  | 510  | 513  | 527  | 497  | 498  | 511     |
|                             | 234                  | 243  | 176  | 214  | 211  | 210  | 191  | 232  | 175     |
|                             | 223                  | 221  | 133  | 171  | 174  | 189  | 142  | 141  | 171     |
|                             | 116                  | 131  | 104  | 124  | 141  | 133  | 87   | 95   | 134     |
|                             | 88                   | 105  | 101  | 105  | 109  | 126  | 78   | 82   | 103     |
|                             | 77                   | 83   | 71   | 86   | 98   | 92   | 67   | 40   | 91      |
|                             | 64                   | 61   | 42   | 56   | 79   | 45   | 42   | -    | 67      |
|                             | -                    | -    | -    | 38   | 29   | -    | -    | -    | 10      |

Supplementary Table 8: PBE-D2 vibrational frequencies (in  $\text{cm}^{-1}$ ) calculated for \*OCCHO on different active sites (Supplementary Figure 15). Vibrational modes can be visualized in the ioChem-BD database (see Supplementary Figure 17 for details).<sup>16</sup> For instance, vibrational modes of adsorbates on Cu(100) are accessible at Ref. [25].

| Model<br>$N_{\text{Cu-Cu}}$ | Oxide-derived copper |      |      |      |      |      |      |      | Cu(100) |
|-----------------------------|----------------------|------|------|------|------|------|------|------|---------|
|                             | 4.46                 | 5.00 | 6.17 | 6.49 | 6.97 | 7.48 | 8.03 | 9.42 | 8.00    |
| *OCCHO                      | 2946                 | 2958 | 2946 | 2954 | 2964 | 2945 | 2955 | 3010 | 2965    |
|                             | 1502                 | 1408 | 1409 | 1455 | 1428 | 1452 | 1473 | 1335 | 1326    |
|                             | 1458                 | 1301 | 1297 | 1303 | 1301 | 1312 | 1307 | 1235 | 1266    |
|                             | 1296                 | 1255 | 1204 | 1252 | 1238 | 1213 | 1272 | 1199 | 1149    |
|                             | 895                  | 1007 | 999  | 996  | 1015 | 1035 | 980  | 1057 | 994     |
|                             | 795                  | 790  | 811  | 833  | 819  | 843  | 811  | 764  | 831     |
|                             | 556                  | 578  | 580  | 584  | 570  | 595  | 561  | 585  | 563     |
|                             | 436                  | 498  | 484  | 484  | 478  | 499  | 453  | 457  | 475     |
|                             | 297                  | 368  | 306  | 294  | 313  | 316  | 287  | 385  | 378     |
|                             | 251                  | 310  | 259  | 283  | 277  | 297  | 274  | 295  | 284     |
|                             | 214                  | 281  | 253  | 222  | 265  | 263  | 237  | 261  | 258     |
|                             | 207                  | 264  | 220  | 210  | 225  | 230  | 214  | 229  | 215     |
|                             | 121                  | 178  | 176  | 173  | 156  | 171  | 148  | 205  | 179     |
|                             | 100                  | 133  | 147  | 135  | 134  | 137  | 133  | 185  | 139     |
|                             | 85                   | 114  | 111  | 118  | 111  | 103  | 107  | 106  | 98      |

Supplementary Table 9: PBE-D2 vibrational frequencies (in  $\text{cm}^{-1}$ ) calculated for \*OHCCOH on different active sites (Supplementary Figure 15). Vibrational modes can be visualized in the ioChem-BD database (see Supplementary Figure 17 for details).<sup>16</sup> For instance, vibrational modes of adsorbates on Cu(100) are accessible at Ref. [26].

| Model<br>$N_{\text{Cu-Cu}}$ | Oxide-derived copper |      |      |      |      |      |      |      | Cu(100) |
|-----------------------------|----------------------|------|------|------|------|------|------|------|---------|
|                             | 4.46                 | 5.00 | 6.17 | 6.49 | 6.97 | 7.48 | 8.03 | 9.42 | 8.00    |
| *OHCCOH                     | 3700                 | 3596 | 3570 | 3686 | 3688 | 3744 | 3644 | 3741 | 3691    |
|                             | 3589                 | 3023 | 3541 | 3543 | 3580 | 3475 | 3577 | 3484 | 3536    |
|                             | 1344                 | 2040 | 1285 | 1322 | 1341 | 2037 | 1389 | 1287 | 1355    |
|                             | 1284                 | 1350 | 1266 | 1293 | 1294 | 1568 | 1285 | 1261 | 1299    |
|                             | 1156                 | 1226 | 1172 | 1159 | 1166 | 1235 | 1180 | 1090 | 1168    |
|                             | 1062                 | 1170 | 1014 | 1056 | 1065 | 691  | 1071 | 967  | 1058    |
|                             | 986                  | 818  | 835  | 973  | 977  | 557  | 975  | 885  | 986     |
|                             | 754                  | 547  | 709  | 748  | 750  | 529  | 749  | 710  | 758     |
|                             | 563                  | 470  | 609  | 581  | 556  | 484  | 542  | 611  | 589     |
|                             | 468                  | 345  | 466  | 511  | 481  | 347  | 449  | 501  | 506     |
|                             | 337                  | 333  | 370  | 370  | 355  | 316  | 347  | 335  | 371     |
|                             | 319                  | 286  | 328  | 350  | 345  | 294  | 319  | 309  | 314     |
|                             | 302                  | 253  | 288  | 292  | 300  | 247  | 287  | 271  | 298     |
|                             | 241                  | 185  | 268  | 253  | 251  | 229  | 226  | 232  | 244     |
|                             | 224                  | 174  | 247  | 210  | 225  | 184  | 188  | 221  | 216     |
|                             | 158                  | 88   | 166  | 148  | 143  | 90   | 122  | 157  | 147     |
|                             | 100                  | 56   | 150  | 97   | 104  | 72   | 96   | 134  | 99      |
|                             | 86                   | 49   | 94   | 79   | 63   | 49   | 47   | 110  | 72      |

Supplementary Table 10: PBE-D2 vibrational frequencies (in  $\text{cm}^{-1}$ ) calculated for \*OCCHOH on different active sites (Supplementary Figure 15). Vibrational modes can be visualized in the ioChem-BD database (see Supplementary Figure 17 for details).<sup>16</sup> For instance, vibrational modes of adsorbates on Cu(100) are accessible at Ref. [27].

| Model<br>N <sub>Cu-Cu</sub> | Oxide-derived copper |      |      |      |      |      |      |      | Cu(100) |
|-----------------------------|----------------------|------|------|------|------|------|------|------|---------|
|                             | 4.46                 | 5.00 | 6.17 | 6.49 | 6.97 | 7.48 | 8.03 | 9.42 | 8.00    |
| *OCCHOH                     | 3569                 | 3610 | 3497 | 3563 | 3587 | 3461 | 3551 | 3576 | 3538    |
|                             | 3164                 | 3076 | 3104 | 3161 | 3126 | 3133 | 3155 | 3006 | 3206    |
|                             | 1433                 | 1398 | 1422 | 1441 | 1399 | 1434 | 1438 | 1354 | 1470    |
|                             | 1317                 | 1319 | 1281 | 1293 | 1310 | 1288 | 1302 | 1299 | 1310    |
|                             | 1228                 | 1228 | 1187 | 1227 | 1227 | 1222 | 1232 | 1205 | 1214    |
|                             | 1099                 | 1108 | 1078 | 1104 | 1105 | 1123 | 1109 | 1090 | 1097    |
|                             | 1009                 | 1002 | 944  | 1000 | 998  | 1026 | 1016 | 976  | 944     |
|                             | 778                  | 775  | 775  | 783  | 780  | 792  | 778  | 778  | 783     |
|                             | 762                  | 717  | 763  | 770  | 759  | 764  | 757  | 695  | 772     |
|                             | 585                  | 512  | 636  | 617  | 539  | 663  | 595  | 515  | 643     |
|                             | 501                  | 505  | 503  | 497  | 503  | 497  | 480  | 485  | 526     |
|                             | 355                  | 375  | 356  | 382  | 311  | 369  | 327  | 345  | 348     |
|                             | 277                  | 314  | 304  | 241  | 306  | 233  | 239  | 265  | 262     |
|                             | 229                  | 224  | 223  | 222  | 234  | 220  | 216  | 205  | 236     |
|                             | 193                  | 194  | 181  | 183  | 152  | 183  | 155  | 184  | 233     |
|                             | 148                  | 124  | 178  | 137  | 135  | 153  | 131  | 132  | 193     |
|                             | 65                   | 112  | 104  | 72   | 102  | 89   | 86   | 125  | 87      |
|                             | 61                   | 77   | 75   | 43   | 73   | 62   | 65   | 95   | 31      |



Supplementary Table 11: PBE-D2 vibrational frequencies (in  $\text{cm}^{-1}$ ) calculated for \*CHO and \*CH on different active sites (Supplementary Figure 15). Vibrational modes can be visualized in the ioChem-BD database (see Supplementary Figure 17 for details).<sup>16</sup> For instance, vibrational modes of adsorbates on Cu(100) are accessible at Refs. [28,29].

| Model              | Oxide-derived copper |      |      |      |      |      |      |      | Cu(100) |
|--------------------|----------------------|------|------|------|------|------|------|------|---------|
| $N_{\text{Cu-Cu}}$ | 4.46                 | 5.00 | 6.17 | 6.49 | 6.97 | 7.48 | 8.03 | 9.42 | 8.00    |
| *CHO               | 2766                 | 2737 | 2781 | 2804 | 1729 | 2875 | 2699 | 2806 | 2876    |
|                    | 1686                 | 1685 | 1489 | 1482 | 1648 | 1366 | 1566 | 1389 | 1227    |
|                    | 1199                 | 1198 | 1254 | 1261 | 1167 | 1250 | 1181 | 1251 | 1130    |
|                    | 688                  | 670  | 687  | 682  | 515  | 582  | 596  | 582  | 547     |
|                    | 454                  | 456  | 467  | 470  | 348  | 455  | 381  | 418  | 441     |
|                    | 197                  | 204  | 281  | 299  | 236  | 287  | 177  | 292  | 278     |
|                    | 131                  | 134  | 198  | 188  | 184  | 229  | 158  | 229  | 232     |
|                    | 49                   | 49   | 184  | 164  | 119  | 207  | 89   | 150  | 174     |
|                    | 42                   | 11   | 75   | 78   | 75   | 133  | 54   | 109  | 164     |
| *CH                | 2914                 | 2973 | 2939 | 3029 | 3003 | 2926 | 2970 | 2995 | 2932    |
|                    | 651                  | 725  | 631  | 620  | 695  | 635  | 683  | 754  | 680     |
|                    | 611                  | 689  | 572  | 609  | 687  | 610  | 677  | 745  | 675     |
|                    | 506                  | 455  | 445  | 532  | 510  | 523  | 486  | 449  | 472     |
|                    | 376                  | 440  | 381  | 438  | 482  | 386  | 449  | 422  | 469     |
|                    | 302                  | 424  | 336  | 365  | 363  | 358  | 379  | 386  | 394     |

Supplementary Table 12: PBE-D2 vibrational frequencies (in  $\text{cm}^{-1}$ ) calculated for  $^*\text{O}^{13}\text{CH}^{13}\text{CH}_2$  and  $^*\text{O}^{13}\text{CH}^{13}\text{CH}_3$  on different active sites (Supplementary Figure 15). Vibrational modes can be visualized in the ioChem-BD database (see Supplementary Figure 17 for details).<sup>16</sup> Vibrational modes on Cu(100) are accessible at Refs. [30,31].

| Model<br>$N_{\text{Cu-Cu}}$ | Oxide-derived copper |      |      |      |      |      |      |      | Cu(100) |
|-----------------------------|----------------------|------|------|------|------|------|------|------|---------|
|                             | 4.46                 | 5.00 | 6.17 | 6.49 | 6.97 | 7.48 | 8.03 | 9.42 | 8.00    |
| $^*\text{OCHCH}_2$          | 3114                 | 3112 | 3123 | 3098 | 3165 | 3105 | 3155 | 3099 | 3139    |
|                             | 3010                 | 3021 | 3022 | 3037 | 3070 | 3004 | 3047 | 3007 | 3034    |
|                             | 2913                 | 2943 | 2956 | 2993 | 3022 | 2907 | 3019 | 2929 | 2935    |
|                             | 1447                 | 1451 | 1443 | 1449 | 1519 | 1445 | 1543 | 1456 | 1438    |
|                             | 1380                 | 1381 | 1367 | 1357 | 1356 | 1369 | 1345 | 1380 | 1353    |
|                             | 1312                 | 1317 | 1270 | 1267 | 1284 | 1317 | 1278 | 1332 | 1240    |
|                             | 1143                 | 1156 | 1158 | 1151 | 1112 | 1148 | 1092 | 1149 | 1143    |
|                             | 968                  | 969  | 963  | 942  | 932  | 970  | 921  | 975  | 943     |
|                             | 929                  | 926  | 908  | 896  | 922  | 907  | 917  | 927  | 895     |
|                             | 827                  | 827  | 814  | 819  | 777  | 826  | 807  | 820  | 816     |
|                             | 720                  | 745  | 731  | 729  | 683  | 727  | 684  | 725  | 727     |
|                             | 512                  | 507  | 525  | 509  | 526  | 493  | 524  | 504  | 516     |
|                             | 338                  | 351  | 322  | 324  | 282  | 358  | 264  | 344  | 342     |
|                             | 324                  | 325  | 277  | 280  | 225  | 319  | 234  | 317  | 278     |
|                             | 219                  | 234  | 232  | 223  | 146  | 234  | 189  | 230  | 242     |
|                             | 128                  | 107  | 161  | 174  | 121  | 117  | 132  | 113  | 177     |
|                             | 93                   | 88   | 127  | 117  | 100  | 87   | 107  | 106  | 127     |
|                             | 53                   | 48   | 94   | 109  | 56   | 73   | 94   | 66   | 92      |
|                             | $^*\text{OCHCH}_3$   | 3036 | 3043 | 3050 | 3080 | 3077 | 3088 | 3053 | 3087    |
| 3010                        |                      | 2991 | 3010 | 3016 | 2995 | 3003 | 2974 | 3005 | 2974    |
| 2929                        |                      | 2919 | 2933 | 2939 | 2929 | 2943 | 2908 | 2884 | 2901    |
| 2886                        |                      | 2913 | 2899 | 2812 | 2853 | 2858 | 2773 | 2877 | 2823    |
| 1616                        |                      | 1607 | 1596 | 1577 | 1598 | 1590 | 1662 | 1564 | 1571    |
| 1391                        |                      | 1399 | 1401 | 1404 | 1401 | 1399 | 1403 | 1394 | 1403    |
| 1383                        |                      | 1380 | 1381 | 1390 | 1392 | 1389 | 1391 | 1369 | 1379    |
| 1366                        |                      | 1367 | 1356 | 1346 | 1359 | 1356 | 1361 | 1347 | 1364    |
| 1307                        |                      | 1308 | 1303 | 1305 | 1306 | 1306 | 1305 | 1293 | 1293    |
| 1085                        |                      | 1080 | 1078 | 1076 | 1082 | 1084 | 1073 | 1077 | 1049    |
| 1052                        |                      | 1048 | 1050 | 1029 | 1040 | 1047 | 1054 | 1028 | 1035    |
| 869                         |                      | 889  | 877  | 875  | 865  | 871  | 857  | 864  | 921     |
| 728                         |                      | 709  | 727  | 712  | 733  | 747  | 733  | 687  | 691     |
| 514                         |                      | 515  | 517  | 504  | 505  | 522  | 490  | 491  | 505     |
| 232                         |                      | 240  | 180  | 212  | 210  | 207  | 187  | 231  | 175     |
| 226                         |                      | 219  | 131  | 169  | 169  | 185  | 136  | 133  | 171     |
| 113                         |                      | 123  | 109  | 124  | 139  | 134  | 79   | 111  | 134     |
| 94                          |                      | 112  | 96   | 101  | 110  | 125  | 72   | 83   | 103     |
| 78                          |                      | 82   | 71   | 77   | 97   | 93   | 67   | 40   | 87      |
| 52                          |                      | 48   | 44   | 42   | 75   | 57   | 35   | –    | 66      |
| –                           |                      | 42   | –    | 27   | 66   | 3    | –    | –    | –       |

Supplementary Table 13: PBE-D2 vibrational frequencies (in  $\text{cm}^{-1}$ ) calculated for  $^*\text{H}_2\text{O}$ ,  $^*\text{OH}$ , and  $^*\text{O}$  on different active sites (Supplementary Figure 15). Vibrational modes can be visualized in the ioChem-BD database (see Supplementary Figure 17 for details).<sup>16</sup> Vibrational modes of adsorbates on Cu(100) are accessible at Refs. [32–34].

| Model                  | Oxide-derived copper |      |      |      |      |      |      |      | Cu(100) |
|------------------------|----------------------|------|------|------|------|------|------|------|---------|
| $N_{\text{Cu-Cu}}$     | 4.46                 | 5.00 | 6.17 | 6.49 | 6.97 | 7.48 | 8.03 | 9.42 | 8.00    |
| $^*\text{H}_2\text{O}$ | 3766                 | 3764 | 3767 | 3739 | 3797 | 3712 | 3694 | 3610 | 3643    |
|                        | 3594                 | 3659 | 3479 | 3607 | 3689 | 3594 | 3569 | 3366 | 3529    |
|                        | 1527                 | 1571 | 1517 | 1562 | 1563 | 1553 | 1549 | 1525 | 1556    |
|                        | 465                  | 507  | 503  | 512  | 470  | 497  | 507  | 628  | 474     |
|                        | 286                  | 419  | 294  | 435  | 388  | 445  | 479  | 534  | 438     |
|                        | 212                  | 243  | 172  | 234  | 223  | 192  | 196  | 258  | 157     |
|                        | 192                  | 103  | 117  | 159  | 85   | 85   | 116  | 183  | 136     |
|                        | 67                   | 57   | 93   | 89   | 38   | 69   | 86   | 127  | 97      |
|                        | 5                    | 12   | –    | 65   | –    | 31   | 60   | 85   | –       |
| $^*\text{OH}$          | 3717                 | 3725 | 3685 | 3730 | 3713 | 3723 | 3690 | 3712 | 3671    |
|                        | 706                  | 718  | 732  | 667  | 712  | 640  | 625  | 786  | 620     |
|                        | 483                  | 504  | 497  | 547  | 463  | 571  | 544  | 444  | 616     |
|                        | 372                  | 387  | 364  | 405  | 335  | 348  | 377  | 364  | 300     |
|                        | 313                  | 318  | 312  | 291  | 290  | 270  | 279  | 314  | 139     |
|                        | 94                   | 108  | 116  | 110  | 155  | 225  | 93   | 116  | 126     |
|                        | –                    | –    | –    | –    | –    | –    | –    | –    | –       |
| $^*\text{O}$           | 422                  | 523  | 393  | 436  | 428  | 422  | 430  | 487  | 339     |
|                        | 396                  | 449  | 301  | 401  | 422  | 403  | 409  | 361  | 338     |
|                        | 353                  | 51   | 251  | 337  | 303  | 352  | 378  | 271  | 310     |

Supplementary Table 14: PBE-D2 vibrational frequencies (in  $\text{cm}^{-1}$ ) calculated for  $^*\text{CO}$  on different active sites (Supplementary Figure 15). Vibrational modes can be visualized in the ioChem-BD database (see Supplementary Figure 17 for details).<sup>16</sup> For instance, vibrational modes of adsorbates on Cu(100) are accessible at Ref. [35].

| Model              | Oxide-derived copper |      |      |      |      |      |      |      | Cu(100) |
|--------------------|----------------------|------|------|------|------|------|------|------|---------|
| $N_{\text{Cu-Cu}}$ | 4.46                 | 5.00 | 6.17 | 6.49 | 6.97 | 7.48 | 8.03 | 9.42 | 8.00    |
| $^*\text{CO}$      | 2042                 | 2047 | 2032 | 1893 | 1794 | 1890 | 1991 | 1768 | 1872    |
|                    | 345                  | 342  | 342  | 311  | 306  | 322  | 326  | 299  | 289     |
|                    | 286                  | 278  | 280  | 288  | 270  | 294  | 284  | 274  | 288     |
|                    | 283                  | 277  | 272  | 253  | 247  | 257  | 252  | 232  | 236     |
|                    | 75                   | 77   | 55   | 140  | 143  | 163  | 60   | 166  | 156     |
|                    | 60                   | 58   | 54   | 56   | 122  | 53   | 41   | 128  | 57      |
|                    | –                    | –    | –    | –    | –    | –    | –    | –    | –       |

Supplementary Table 15: Cu-Cu distances for atoms (1-10) within the coordination shell of the adsorbing site. AD stands for adatom. Structural models are reported in Supplementary Figure 15 and Supplementary Figure 23.

| Site             | N <sub>Cu-Cu</sub> | 1    | 2    | 3    | 4    | 5    | 6    | 7    | 8    | 9    | 10   |
|------------------|--------------------|------|------|------|------|------|------|------|------|------|------|
| Cu(111)-2AD      | 4.00               | 2.41 | 2.42 | 2.44 | 2.46 | -    | -    | -    | -    | -    | -    |
| Cu(211)-2AD      | 4.00               | 2.39 | 2.42 | 2.45 | 2.47 | -    | -    | -    | -    | -    | -    |
| Cu(100)-2AD      | 5.00               | 2.43 | 2.43 | 2.46 | 2.46 | 2.48 | -    | -    | -    | -    | -    |
| Cu(111)-3AD      | 5.00               | 2.44 | 2.44 | 2.44 | 2.48 | 2.48 | -    | -    | -    | -    | -    |
| Cu(711)-2AD      | 5.00               | 2.42 | 2.44 | 2.45 | 2.46 | 2.47 | -    | -    | -    | -    | -    |
| Cu(100)-4AD      | 6.00               | 2.45 | 2.47 | 2.47 | 2.48 | 2.50 | 2.50 | -    | -    | -    | -    |
| Cu(310)          | 6.00               | 2.46 | 2.47 | 2.47 | 2.52 | 2.52 | 2.56 | -    | -    | -    | -    |
| Cu(711)          | 7.00               | 2.47 | 2.47 | 2.51 | 2.51 | 2.53 | 2.56 | 2.56 | -    | -    | -    |
| Cu(110)          | 7.00               | 2.50 | 2.51 | 2.51 | 2.51 | 2.51 | 2.57 | 2.57 | -    | -    | -    |
| Cu(211)          | 7.00               | 2.48 | 2.48 | 2.51 | 2.51 | 2.51 | 2.56 | 2.56 | -    | -    | -    |
| Cu(533)          | 7.00               | 2.45 | 2.50 | 2.50 | 2.52 | 2.52 | 2.56 | 2.56 | -    | -    | -    |
| Cu(100)          | 8.00               | 2.53 | 2.53 | 2.53 | 2.53 | 2.57 | 2.57 | 2.57 | 2.57 | -    | -    |
| Cu(111)          | 9.00               | 2.54 | 2.54 | 2.54 | 2.57 | 2.57 | 2.57 | 2.57 | 2.57 | 2.57 | -    |
| distorted site 1 | 4.46               | 2.34 | 2.45 | 2.51 | -    | -    | -    | -    | -    | -    | -    |
| distorted site 2 | 5.00               | 2.34 | 2.48 | 2.57 | 2.60 | 2.60 | -    | -    | -    | -    | -    |
| distorted site 3 | 6.17               | 2.41 | 2.47 | 2.47 | 2.53 | 2.59 | 2.63 | -    | -    | -    | -    |
| distorted site 4 | 6.49               | 2.46 | 2.46 | 2.48 | 2.48 | 2.53 | 2.56 | -    | -    | -    | -    |
| distorted site 5 | 6.97               | 2.37 | 2.43 | 2.46 | 2.48 | 2.49 | 2.50 | 2.63 | -    | -    | -    |
| distorted site 6 | 7.48               | 2.38 | 2.40 | 2.41 | 2.45 | 2.46 | 2.53 | 2.58 | -    | -    | -    |
| distorted site 7 | 8.03               | 2.46 | 2.50 | 2.56 | 2.56 | 2.58 | 2.59 | 2.62 | 2.62 | -    | -    |
| distorted site 8 | 9.42               | 2.39 | 2.40 | 2.48 | 2.50 | 2.51 | 2.57 | 2.60 | 2.60 | 2.63 | 2.68 |

Supplementary Table 16: DFT adsorption energy (in eV) for \*CO adsorption on atop sites on well-defined crystalline domains taken from Ref. [36] and distorted morphologies from Ref.<sup>8</sup>. Relative coordination numbers, localized 3D strains, d- and s-band center (vs Fermi energy) have been calculated according to Supplementary Eqs. (3)-(6). AD stands for adatom.

| Site             | $N_{\text{Cu-Cu}}$ | 3D Strain (%) | $\Sigma(\Delta d/d)$ | $N_{\text{Cu-Cu}}^{-1}$ (%) | $\varepsilon_d - \varepsilon_F / \text{eV}$ | $\varepsilon_s - \varepsilon_F / \text{eV}$ | $\Delta E^{*CO\text{-atop}}$ |
|------------------|--------------------|---------------|----------------------|-----------------------------|---------------------------------------------|---------------------------------------------|------------------------------|
| Cu(111)-2AD      | 4.00               | 21.30         | 5.32                 | -1.59                       | +0.79                                       | -0.42                                       |                              |
| Cu(211)-2AD      | 4.00               | 21.30         | 5.32                 | -1.82                       | -0.24                                       | -0.39                                       |                              |
| Cu(100)-2AD      | 5.00               | 22.83         | 4.57                 | -1.81                       | +0.23                                       | -0.29                                       |                              |
| Cu(111)-3AD      | 5.00               | 22.05         | 4.41                 | -1.73                       | +0.49                                       | -0.37                                       |                              |
| Cu(711)-2AD      | 5.00               | 23.60         | 4.72                 | -2.00                       | -0.97                                       | -0.34                                       |                              |
| Cu(100)-4AD      | 6.00               | 21.24         | 3.54                 | -1.95                       | -0.25                                       | -0.26                                       |                              |
| Cu(310)          | 6.00               | 16.18         | 2.70                 | -1.12                       | +3.28                                       | -0.30                                       |                              |
| Cu(711)          | 7.00               | 14.60         | 2.09                 | -2.04                       | -0.47                                       | -0.22                                       |                              |
| Cu(110)          | 7.00               | 11.93         | 1.70                 | -1.94                       | +0.35                                       | -0.34                                       |                              |
| Cu(211)          | 7.00               | 14.60         | 2.09                 | -1.94                       | +0.51                                       | -0.31                                       |                              |
| Cu(533)          | 7.00               | 14.60         | 2.09                 | -2.25                       | -2.89                                       | -0.24                                       |                              |
| Cu(100)          | 8.00               | 6.12          | 0.76                 | -1.81                       | +1.17                                       | -0.24                                       |                              |
| Cu(111)          | 9.00               | 3.42          | 0.38                 | -1.88                       | +1.26                                       | -0.18                                       |                              |
| distorted site 1 | 4.46               | 15.87         | 3.56                 | -2.22                       | -3.33                                       | -0.29                                       |                              |
| distorted site 2 | 5.00               | 12.37         | 2.47                 | -2.06                       | -3.03                                       | -0.33                                       |                              |
| distorted site 3 | 6.17               | 15.46         | 2.50                 | -2.25                       | -3.53                                       | -0.13                                       |                              |
| distorted site 4 | 6.49               | 17.35         | 2.67                 | -2.32                       | -3.54                                       | -0.18                                       |                              |
| distorted site 5 | 6.97               | 26.69         | 3.83                 | -2.51                       | -4.01                                       | -0.01                                       |                              |
| distorted site 6 | 7.48               | 30.58         | 4.09                 | -2.61                       | -4.23                                       | +0.03                                       |                              |
| distorted site 7 | 8.03               | 7.67          | 0.96                 | -2.39                       | -3.75                                       | +0.01                                       |                              |
| distorted site 8 | 9.42               | 22.02         | 2.34                 | -2.62                       | -4.43                                       | +0.08                                       |                              |

Supplementary Table 17: Fit parameters of correlations reported in Supplementary Figure 25.

| Correlation of $\varepsilon_s - \varepsilon_F$ VS $\varepsilon_d - \varepsilon_F$ | a (eV)         | b (-)            | $R^2$ | $\chi^2$ |
|-----------------------------------------------------------------------------------|----------------|------------------|-------|----------|
| Distorted domains                                                                 | $+1.8 \pm 0.3$ | $+2.34 \pm 0.14$ | 0.97  | 0.03     |
| Crystalline domains                                                               | $+9 \pm 1$     | $+4.6 \pm 0.8$   | 0.74  | 5.6      |

Supplementary Table 18. C-C bond length for different C<sub>2+</sub> intermediates. Typical values are 1.54 Å for a single bond, 1.34 Å for a double bond, 1.20 Å for a triple bond.

| N <sub>Cu-Cu</sub> | Σ(Δd/d) N <sub>Cu-Cu</sub> <sup>-1</sup> (%) | C-C bond length / pm |                    |        |         |                     |                     |                     |  |
|--------------------|----------------------------------------------|----------------------|--------------------|--------|---------|---------------------|---------------------|---------------------|--|
|                    |                                              | *COCO                | *COCO <sub>H</sub> | *OCCHO | *HOCCOH | *OCCHO <sub>H</sub> | *OCHCH <sub>2</sub> | *OCHCH <sub>3</sub> |  |
| 4.46               | 3.56                                         | –                    | 1.50               | 1.50   | 1.41    | 1.40                | 1.41                | 1.48                |  |
| 5.00               | 2.47                                         | 1.34                 | 1.29               | 1.46   | 1.26    | 1.41                | 1.41                | 1.48                |  |
| 6.17               | 2.50                                         | –                    | 1.34               | 1.45   | 1.42    | 1.41                | 1.40                | 1.49                |  |
| 6.49               | 2.67                                         | 1.47                 | 1.44               | 1.46   | 1.41    | 1.39                | 1.39                | 1.49                |  |
| 6.97               | 3.83                                         | 1.67                 | 1.49               | 1.46   | 1.42    | 1.42                | 1.35                | 1.49                |  |
| 7.48               | 4.09                                         | 1.53                 | 1.42               | 1.46   | 1.31    | 1.40                | 1.41                | 1.49                |  |
| 8.03               | 0.96                                         | –                    | 1.45               | 1.47   | 1.39    | 1.39                | 1.34                | 1.49                |  |
| 9.42               | 2.34                                         | 1.44                 | 1.30               | 1.42   | 1.43    | 1.45                | 1.41                | 1.49                |  |
| 8.00               | 0.76                                         | 1.34                 | 1.34               | 1.43   | 1.41    | 1.38                | 1.39                | 1.49                |  |

Supplementary Table 19: Fit parameters of correlations reported in Supplementary Figure 26.

| Correlation of F.E.                   | a (%)        | b (-)          | R <sup>2</sup> | χ <sup>2</sup> |
|---------------------------------------|--------------|----------------|----------------|----------------|
| EtOH vs C <sub>2</sub> H <sub>4</sub> | -2.4 ± 1.5   | +0.48 ± 0.08   | 0.90           | 2.53           |
| Acetaldehyde vs EtOH                  | +0.04 ± 0.04 | +0.027 ± 0.006 | 0.82           | 0.004          |
| 1-PrOH vs Allyl Alcohol               | +0.5 ± 0.3   | +1.9 ± 0.3     | 0.94           | 0.20           |

## Supplementary References

- Schouten, K. J. P., van der Ham, C. J. M., Qin, Z. & Koper, M. T. M. A new mechanism for the selectivity to C<sub>1</sub> and C<sub>2</sub> species in the electrochemical reduction of carbon dioxide on copper electrodes. *Chem. Sci.* 2, 1902 (2011).
- Delmo, E. P. et al. The Role of Glyoxal as an Intermediate in the Electrochemical CO<sub>2</sub> Reduction Reaction on Copper. *The Journal of Physical Chemistry C* 127, 4496–4510 (2023).
- Reichert, A. M., Piqué, O., Parada, W. A., Katsounaros, I. & Calle-Vallejo, F. Mechanistic insight into electrocatalytic glyoxal reduction on copper and its relation to CO<sub>2</sub> reduction. *Chem Sci* 13, 11205–11214 (2022).
- Kuhl, K. P., Cave, E. R., Abram, D. N. & Jaramillo, T. F. New insights into the electrochemical reduction of carbon dioxide on metallic copper surfaces. *Energy Environ. Sci.* 5, 7050–7059 (2012).
- Garza, A. J., Bell, A. T. & Head-Gordon, M. Mechanism of CO<sub>2</sub> reduction at copper surfaces: Pathways to C<sub>2</sub> products. *ACS Catal.* 8, 1490–1499 (2018).
- Birdja, Y. Y. et al. Advances and challenges in understanding the electrocatalytic conversion of carbon dioxide to fuels. *Nat Energy* 4, 732–745 (2019).
- Mavrikakis, M., Hammer, B. & Nørskov, J. K. Effect of strain on the reactivity of metal surfaces. *Phys Rev Lett* 81, 2819–2822 (1998).
- Bernal, M. et al. CO<sub>2</sub> electroreduction on copper-cobalt nanoparticles: Size and composition effect. *Nano Energy* 53, 27–36 (2018).
- Zhan, C. et al. Revealing the CO coverage-driven C–C coupling mechanism for electrochemical CO<sub>2</sub> reduction on Cu<sub>2</sub>O nanocubes via Operando Raman spectroscopy. *ACS Catal.* 11, 7694–7701 (2021).
- Dattila, F., García-Muelas, R. & López, N. Active and Selective Ensembles in Oxide-Derived Copper Catalysts for CO<sub>2</sub> Reduction. *ACS Energy Lett.* 5, 3176–3184 (2020).
- Álvarez-Moreno, M. et al. Managing the computational chemistry big data problem: The ioChem-BD platform. *J Chem Inf Model* 55, 95–103 (2015).
- Yang, Y. et al. Operando studies reveal active Cu nanograins for CO<sub>2</sub> electroreduction. *Nature* 614, 262–269 (2023).
- Sebastián-Pascual, P. & Escudero-Escribano, M. Surface characterization of copper electrocatalysts by lead underpotential deposition. *J. Electroanal. Chem.* 896, 115446 (2021).
- Li, J. et al. Intercepting Elusive Intermediates in Cu-Mediated CO Electrochemical Reduction with Alkyl Species. *J Am Chem Soc* 144, 20495–20506 (2022).
- Chang, X., Malkani, A., Yang, X. & Xu, B. Mechanistic Insights into Electroreductive C–C Coupling between CO and Acetaldehyde into Multicarbon Products. *J Am Chem Soc* 142, 2975–2983 (2020).
- Dattila, F. Raman-C2. ioChem-BD <https://doi.org/10.19061/iochem-bd-1-251> (2024) doi:10.19061/iochem-bd-1-251.
- Dattila, F. Cu(100)-p(3×3)-CO<sub>3</sub>. ioChem-BD <https://iochem-bd.iciq.es/browse/cml2html/100/40740/output.cml> (2024).
- Dattila, F. Cu(100)-p(3×3)-HCO<sub>2</sub>. ioChem-BD <https://iochem-bd.iciq.es/browse/cml2html/100/40742/output.cml> (2024).
- Dattila, F. Cu(100)-p(3×3)-HCOOH. ioChem-BD <https://iochem-bd.iciq.es/browse/cml2html/100/40741/output.cml> (2024).
- Dattila, F. Cu(100)-p(3×3)-COCO. ioChem-BD <https://iochem-bd.iciq.es/browse/cml2html/100/40737/output.cml> (2024).

21. Dattila, F. Cu(100)-p(3×3)-COCOH. ioChem-BD <https://iochem-bd.iciq.es/browse/cml2html/100/40736/output.cml> (2024).
22. Dattila, F. Cu(100)-p(3×3)-COCO<sub>2</sub>. ioChem-BD <https://iochem-bd.iciq.es/browse/cml2html/100/40735/output.cml> (2024).
23. Dattila, F. Cu(100)-p(3×3)-OCHCH<sub>2</sub>. ioChem-BD <https://iochem-bd.iciq.es/browse/cml2html/100/40738/output.cml> (2024).
24. Dattila, F. Cu(100)-p(3×3)-OCHCH<sub>3</sub>. ioChem-BD <https://iochem-bd.iciq.es/browse/cml2html/100/40732/output.cml> (2024).
25. Dattila, F. Cu(100)-p(3×3)-OCCHO. ioChem-BD <https://iochem-bd.iciq.es/browse/cml2html/100/40729/output.cml> (2024).
26. Dattila, F. Cu(100)-p(3×3)-HOCCOH. ioChem-BD <https://iochem-bd.iciq.es/browse/cml2html/100/40731/output.cml> (2024).
27. Dattila, F. Cu(100)-p(3×3)-OCCHOH. ioChem-BD <https://iochem-bd.iciq.es/browse/cml2html/100/40728/output.cml> (2024).
28. Dattila, F. Cu(100)-p(3×3)-CHO. ioChem-BD <https://iochem-bd.iciq.es/browse/cml2html/100/40730/output.cml> (2024).
29. Dattila, F. Cu(100)-p(3×3)-CH. ioChem-BD <https://iochem-bd.iciq.es/browse/cml2html/100/40744/output.cml> (2024).
30. Dattila, F. Cu(100)-p(3×3)-OCHCH<sub>2</sub>-<sup>13</sup>C. ioChem-BD <https://iochem-bd.iciq.es/browse/cml2html/100/68201/output.cml> (2024).
31. Dattila, F. Cu(100)-p(3×3)-OCHCH<sub>3</sub>-<sup>13</sup>C. ioChem-BD <https://iochem-bd.iciq.es/browse/cml2html/100/68199/output.cml> (2024).
32. Dattila, F. Cu(100)-p(3×3)-H<sub>2</sub>O. ioChem-BD <https://iochem-bd.iciq.es/browse/cml2html/100/40745/output.cml> (2024).
33. Dattila, F. Cu(100)-p(3×3)-OH. ioChem-BD <https://iochem-bd.iciq.es/browse/cml2html/100/40746/output.cml> (2024).
34. Dattila, F. Cu(100)-p(3×3)-O. ioChem-BD <https://iochem-bd.iciq.es/browse/cml2html/100/40747/output.cml> (2024).
35. Dattila, F. Cu(100)-p(3×3)-CO. ioChem-BD <https://iochem-bd.iciq.es/browse/cml2html/100/40743/output.cml> (2024).
36. Calle-Vallejo, F., Loffreda, D., Koper, M. T. M. & Sautet, P. Introducing structural sensitivity into adsorption-energy scaling relations by means of coordination numbers. *Nat Chem* 7, 403–410 (2015).
